1 **Comparison of ultracentrifugation and a commercial kit for isolation of exosomes derived**  
2 **from glioblastoma and breast cancer cells**

3 Frøydis Sved Skottvoll<sup>a\*</sup>, Henriette Engen Berg<sup>a\*</sup>, Kamilla Bjørseth<sup>a</sup>, Kaja Lund<sup>b</sup>, Norbert  
4 Roos<sup>c</sup>, Sara Bekhradnia<sup>a</sup>, Bernd Thiede<sup>c</sup>, Cecilie Sandberg<sup>d</sup>, Einar Vik-Mo<sup>d,e</sup>, Hanne Roberg-  
5 Larsen<sup>a</sup>, Bo Nyström<sup>a</sup>, Elsa Lundanes<sup>a</sup>, Steven Ray Wilson<sup>a†</sup>

6 <sup>a</sup> Department of Chemistry, University of Oslo, Post Box 1033, Blindern, NO-0315 Oslo, Norway

7 <sup>b</sup> Department of Microbiology, Unit Cell Signaling, Oslo University Hospital, Gaustadalleen 34, NO-  
8 0372 Oslo, Norway

9 <sup>c</sup> Department of Biosciences, University of Oslo, Post Box 1066, Blindern, NO-0316 Oslo, Norway

10 <sup>d</sup> Vilhelm Magnus Laboratory of Neurosurgical Research, Institute for Surgical Research and  
11 Department of Neurosurgery, Oslo University Hospital, 4950 Nydalen, NO-0424 Oslo, Norway

12 <sup>e</sup> Institute of Clinical Medicine, Faculty of Medicine, University of Oslo, Post Box 1171, Blindern NO-  
13 0318 Oslo, Norway

14

15 \* These authors have contributed equally to the work.

16 † Corresponding author: [stevenw@kjemi.uio.no](mailto:stevenw@kjemi.uio.no), +47 97010953

17 E-mail addresses: [f.s.skottvoll@kjemi.uio.no](mailto:f.s.skottvoll@kjemi.uio.no); [h.e.berg@kjemi.uio.no](mailto:h.e.berg@kjemi.uio.no); [milla-@hotmail.com](mailto:milla-@hotmail.com);  
18 [kaja.lund@legemiddelverket.no](mailto:kaja.lund@legemiddelverket.no); [bernd.thiede@ibv.uio.no](mailto:bernd.thiede@ibv.uio.no); [cecilie.Sandberg@rr-research.no](mailto:cecilie.Sandberg@rr-research.no);  
19 [einar.vik-mo@rr-research.no](mailto:einar.vik-mo@rr-research.no); [hanne.roberg-larsen@kjemi.uio.no](mailto:hanne.roberg-larsen@kjemi.uio.no); [b.o.g.nystrom@kjemi.uio.no](mailto:b.o.g.nystrom@kjemi.uio.no);  
20 [elsa.lundanes@kjemi.uio.no](mailto:elsa.lundanes@kjemi.uio.no); [norbert.roos@ibv.uio.no](mailto:norbert.roos@ibv.uio.no); [bekhradnia.s@gmail.com](mailto:bekhradnia.s@gmail.com)

21

22 **Running Title:** Exosome isolation from glioblastoma and breast cancer cells

23 **Key words:** Exosomes; Ultracentrifugation; LC-MS/MS; Proteomics; Glioblastoma; Breast  
24 cancer

25 **Declaration of interest:** The authors declare that there is no conflict of interest.

## 26 **Abbreviations**

27 ABC, ammonium bicarbonate; AGC, automatic gain control; BC, breast cancer; BCA,  
28 bicinchoninic acid; dd, data-dependent; DLS, dynamic light scattering; DMEM/F12, Dulbecco's  
29 modified eagle medium with nutrient mixture F-12; ER, endoplasmic reticulum; EVs,  
30 extracellular vesicles; FA, formic acid; FBS, fetal bovine serum; FSG, fish serum gelatine; GBM,  
31 glioblastoma multiforme; GO, gene ontology; IAM, 2-iodoacetamide; ISEV, The International  
32 Society of Extracellular Vesicles; LC-MS/MS, liquid chromatography tandem MS; MP, mobile  
33 phase; MVBs, multivesicular bodies; NMR, nuclear magnetic resonance; RPMI, Rosewell Park  
34 Memorial Institute; RT, room temperature; S/N, signal to noise ratio; TEM, transmission electron  
35 microscopy; UC, ultracentrifugation; WB, Western blot

36

37

38

39

40

41

42

43

44

45

46

47

48

## 49 **ABSTRACT**

50 Exosomes are small extracellular vesicles around 30-100 nm in diameter that are secreted from  
51 cells and can be found in most body fluids. Exosomes can be a vital source of biomarkers as they  
52 contain various substances (e.g. lipids, RNAs, metabolites and proteins) that can reflect the cell  
53 of origin (e.g. cancer cells). For isolation of exosomes present in biological matrices,  
54 ultracentrifugation (UC)-based procedures are most common. Other approaches exist, including  
55 commercial kits developed for easy and low sample volume isolation. In this study, differential  
56 UC and an isolation kit from a major vendor (Total Exosome Isolation Reagent from Thermo  
57 Fisher Scientific) were compared. Exosomes were isolated from cell culture media of two  
58 different cell sources (patient derived cells from glioblastoma multiforme and the breast cancer  
59 cell line MDA-MB-231). For both isolation methods, transmission electron microscopy, dynamic  
60 light scattering and western blotting indicated the presence of exosomes. The kit- and UC isolates  
61 contained similar amounts of protein measured by the bicinchoninic acid (BCA) assay with  
62 absorbance at 562 nm. Using western blot, positive exosome markers were identified in all  
63 isolates, and additional exosome markers were identified using MS-based proteomics. For the  
64 glioblastoma exosome isolates, the number of proteins identified with liquid chromatography  
65 tandem MS (LC-MS/MS) was higher for the UC isolates than the kit isolates when injecting  
66 equal protein amounts, contrary to that for the breast cancer exosome isolates. However, negative  
67 exosome markers were also found in glioblastoma isolates using LC-MS/MS. Thus, we would  
68 not use the term “exosome isolation” as impurities may be present with both isolation methods.  
69 Notably, potential biomarkers for both diseases were identified in the isolates using LS-MS/MS.  
70 In our opinion, the two isolation methods had rather similar performance, although with some  
71 minor differences based on cell of origin.

## 72 **1 Introduction**

73 Exosomes are extracellular vesicles (EVs) with membrane-surrounded bodies of 30-100 nm sizes  
74 which are secreted from cells to the extracellular environment as a part of the endocytic pathway  
75 (1). Exosomes are formed by invagination of an endosome membrane to create intraluminal  
76 vesicles inside the endosome (i.e. multivesicular bodies (MVBs)) and are secreted when the  
77 endosomes fuse with the plasma membrane (2). Exosomes commonly contain proteins  
78 originating from the cellular cytosol and the plasma membrane, nucleic acids (e.g. DNA, mRNA,  
79 microRNA and non-coding RNA), lipids and metabolites (1, 3-8), and are believed to take part in  
80 e.g. cell-cell communication, transfer of proteins/nucleic acids, coagulation and antigen  
81 presentation (6, 9).

82  
83 Cancer cells have been found to release more exosomes than stromal cells (10, 11) and exosomes  
84 are associated with metastasis and tumor progression (7, 12, 13). Hence, cancer exosomes may be  
85 a source of biomarkers for diagnosing cancers such as breast cancer (BC) and glioblastoma  
86 multiforme (GBM) when e.g. isolated from body fluids. BC is the predominant type of female  
87 cancer (14), with recurrent metastatic disease being responsible for the majority of BC-caused  
88 deaths (15). GBM is the most frequently and malignant form of brain cancer (16-18). The  
89 diagnosis of both BC and GBM rely on highly invasive patient tissue biopsies at relatively late  
90 stages (16, 19, 20). Thus, a non-invasive disease monitoring is desirable for both BC and GBM,  
91 and can be achieved by measuring biomarkers in accessible body fluids, such as blood (liquid  
92 biopsy), for early diagnosis and prognosis assessment (16, 21-23). Hence, the isolation of  
93 exosomes for cancer biomarker discovery has emerged as an alternative to invasive  
94 methodologies (23-31).

95  
96 Isolation of exosomes is predominantly performed from body fluids (e.g. blood, urine, and saliva)  
97 or cell culture media by centrifugation-based methods (e.g. sucrose density gradient  
98 centrifugation or ultracentrifugation (UC)) (32, 33). In addition, other isolation protocols and  
99 principles have been developed to overcome the drawbacks of UC such as the large amounts of  
100 starting material needed, low yield, and poor reproducibility (8, 34-41). Moreover, there is a great  
101 need for exosome isolation protocols tailored towards smaller starting volumes (<  $\mu$ L) for e.g.  
102 miniaturized cell culture models like organoids and “organ on a chip” (42, 43). However, there is  
103 a lack of consensus as the methods for rigorous isolation are still largely empirical.

104  
105 The protein content of exosomes has previously been characterized using western blot (WB) as  
106 standard method but also liquid chromatography tandem MS (LC-MS/MS) has been applied (41,  
107 44). Tetraspanins (e.g. CD9, CD63 and CD81) are commonly used as positive exosome protein  
108 markers for targeted analysis as they are particularly known to be enriched in exosomes  
109 compared to cells (1, 45-48). Positive exosome markers generally take part in exosome  
110 biogenesis, and are hence expected to be present in, but are not specific to, exosomes (49). A  
111 broad range of positive and negative exosome markers for exosome characterization are provided  
112 by The International Society of Extracellular Vesicles (ISEV) (45). In addition, protein databases  
113 covering proteins occurring in exosomes and other extracellular vesicles are available (50-52).  
114 ISEV also recommends using supplementary characterization methods in addition to WB and  
115 LC-MS/MS (e.g. size distribution and imaging), to study the heterogeneity and morphology of  
116 vesicles present in the isolated samples.

117

118 In the present study, we have compared two exosome isolation methods (UC and a commercial  
119 kit for precipitation of exosomes) with a particular emphasis on the characterization methods  
120 used for identifying exosomes and evaluating the purity (the presence of positive exosome  
121 markers and absence of non-exosome proteins) of the isolated exosomes. The methods were  
122 evaluated using characterization techniques recommended by ISEV: WB, transmission electron  
123 microscopy (TEM), dynamic light scattering (DLS), quantitative total protein analysis using UV-  
124 Vis spectrophotometry and LC-MS/MS for untargeted proteomic analysis. Exosomes were  
125 isolated from cell culture media from free floating patient-derived primary cell cultures from  
126 GBM biopsies (T1018) and a traditionally serum cultivated, adherently growing BC cell line  
127 (MDA-MB-231). Comparison of exosome isolation techniques for these cell culturing conditions  
128 has not been performed, and studies on exosome presence and purity are also limited for such cell  
129 cultures.

## 130 **2 Experimental Procedures**

131 Unless otherwise stated, water (commonly type 1 water purified by a Direct-Q® water  
132 purification system from Millipore (Billerica, MA, USA)) was used as solvent. For detailed  
133 information about chemicals, solutions and experimental methods used, see **Supplemental**  
134 **Methods**.

135

### 136 **2.1 MDA MB-231 cell culturing**

137 The BC cell line was purchased from American Type Culture Collection (ATCC, Sesto San  
138 Giovanni, Milan, Italy) and is derived from a triple-negative human metastatic breast carcinoma.  
139 The cells were maintained in Rosewell Park Memorial Institute (RPMI) 1640 growth medium  
140 depleted of phenol red (Sigma-Aldrich, St. Louis, MO, USA) supplemented with 10 % exosome-

141 depleted fetal bovine serum (FBS) (System Biosciences, Palo Alto, CA, USA) and 1 %  
142 penicillin/streptomycin (Sigma- Aldrich). The cells were incubated in a humidifying atmosphere  
143 at 5 % CO<sub>2</sub> and at 37 °C. Prior to exosome isolation, 1-2.3 million cells (in T75-T175 culturing  
144 flasks) were incubated for 6-7 days (always using a passage lower than 12). The incubated cell  
145 culture medium was centrifuged at 906 × g (30 minutes at 23 °C).

146

## 147 **2.2 Glioblastoma cell culturing**

148 The GBM cells (T1018) were derived from biopsies from a primary GBM tumour, obtained after  
149 informed consent through a biobank approved by the Regional Ethical Authorities operated at  
150 Oslo University Hospital (2016/1791). The cells were maintained in Dulbecco's modified eagle  
151 medium with nutrient mixture F-12 (DMEM/F12, Gibco, Thermo Fisher Scientific, Waltham,  
152 MA, USA), supplemented with HEPES buffer (10 mM) and penicillin/streptomycin (100 U/mL)  
153 from Lonza (Basel, Switzerland), B27 without vitamin A (1/50) from Thermo Fisher Scientific,  
154 epidermal growth factor (20 ng/mL) and basic fibroblast growth factor (10 ng/ mL) from R&D  
155 Systems (Minneapolis, MN, USA) and heparin (2.5 µg/mL) obtained from LEO Pharma AS  
156 (Ballerup, Denmark). Under these culturing conditions cells express stem cell markers *in vitro*,  
157 differentiate upon removal of growth factors and give rise to diffusely infiltrative tumors upon  
158 xenografting (53). The cells were incubated in a humidifying atmosphere at 5 % CO<sub>2</sub> and 37 °C  
159 in T25 flasks (Thermo Fisher Scientific). Prior to exosome isolation, the incubated cell culture  
160 medium was centrifuged twice at 453 × g and 1811 × g for 5 minutes each. The cell pellets were  
161 harvested for WB analysis.

162

## 163 **2.3 Exosome isolation by ultracentrifugation**

164 For the BC and GBM cells, 9-12 mL and 60 mL cell culture media were used for centrifugation,  
165 respectively. Cell culture media were first centrifuged at  $1811 \times g$  (5 minutes at 20 °C). The  
166 supernatants were then centrifuged at  $20\,000 \times g$  (20 minutes at 20 °C) with an Allegra 25R  
167 centrifuge (with TA-14-50 rotor) from Beckman Coulter (Brea, CA, USA) and the supernatants  
168 were transferred to polycarbonate ultracentrifugation tubes (Beckman Coulter) and diluted with  
169 PBS until the tubes were full (~60 mL in each). The tubes were centrifuged twice at  $100\,000 \times g$   
170 (90 minutes at 4 °C) with an L-80 ultracentrifuge (45 Ti rotor) from Beckman Coulter. The  
171 supernatants were removed (leaving suspension 1 cm above the pellets) and the pellets were  
172 suspended with PBS between the centrifugations. Upon centrifugation, the supernatants were  
173 discarded and the exosome pellets (UC isolates) were suspended in either PBS (3 mL for DLS-  
174 and 50-100  $\mu$ L for TEM analysis) or the preferred lysis buffer (**Section 2.5**).

175

#### 176 **2.4 Exosome isolation by isolation kit**

177 The isolation of exosomes with kit was performed with the Total Exosome Isolation Reagent  
178 (from cell culture media) from Thermo Fisher Scientific (catalog nr. 4478359). The isolation was  
179 performed according to the protocol of the supplier (54). Starting volumes ranged from 0.5 mL to  
180 9 mL cell culture medium for the BC cells and 5 mL to 6 mL for the GBM cells. The samples  
181 were centrifuged with the Allegra 25R centrifuge, and the exosome pellets (kit isolates) were  
182 suspended as with UC (**Section 2.3**).

183

#### 184 **2.5 Protein extraction**

185 Cell and exosome protein extracts were made by lysis with RIPA- or Nonidet™ P40 (NP40)  
186 buffer (both from Thermo Fisher Scientific) containing protease inhibitors (Protease Inhibitor  
187 Cocktail Tablets, Roche, Basel, Switzerland) and phosphatase inhibitors (PhosStop Tablets,



188 Sigma-Aldrich). For BC isolates, the NP40 buffer was prepared from NP40 detergent solution as  
189 described in **Supplemental Methods (S-2.1)**, while “ready to use” NP40 buffer from the vendor  
190 was used for GBM isolates. For WB analysis, the BC isolates were lysed in 50  $\mu$ L of the RIPA  
191 solution and the BC cells in 100  $\mu$ L RIPA solution. The GBM isolates were lysed in 300  $\mu$ L of  
192 the RIPA solution, and the GBM cells in 1 mL RIPA solution. For LC-MS/MS analysis, BC- and  
193 GBM isolates were lysed in 50  $\mu$ L NP40 buffer. All extracts were incubated while rotating for 30  
194 minutes (4 °C), and then snap frozen (at -80 °C). The extracted samples were thawed and  
195 centrifuged at  $20\,570 \times g$  (30 minutes at 2°C) using a Heraeus Fresco 21 centrifuge or an  
196 Eppendorf 5424R centrifuge. The pellets were discarded.

197

## 198 **2.6 UV-Vis spectrophotometry**

199 The protein amount was measured using Pierce™ BCA protein Assay Kit (Thermo Fisher  
200 Scientific), by measuring the absorbance at 562 nm. The GBM protein measurements were  
201 performed on a Nanodrop 2000 Spectrophotometer (Thermo Fisher Scientific). The BC protein  
202 measurements were performed using a Wallac Victor2 1420 multilabel counter and Wallac 1420  
203 Workstation software (version 3.00), both from Perkin Elmer (Waltham, MA, USA).

204

## 205 **2.7 Western blotting**

206 The protein extracts containing 3-15  $\mu$ g protein were diluted with water giving equal protein  
207 concentrations before adding 5x loading buffer (see **Supplemental Methods** for solution  
208 preparation) to yield 1x. Prior to electrophoresis, the protein extracts were boiled for 3 minutes at  
209 92 °C. The protein extracts together with PageRuler™ Prestained protein ladder (Thermo Fisher  
210 Scientific) were loaded on to 4-12 % Bis-Tris gels (Thermo Fisher Scientific) and run at 70-75 V  
211 for 1 hour. The voltage was increased to 110 V after the first hour if the bromophenol blue lane

212 was horizontally distributed. The SDS running buffers used were MOPS or MES, both purchased  
213 from Thermo Fisher Scientific. Proteins were transferred to a 45  $\mu$ m nitrocellulose membrane  
214 (Thermo Fisher Scientific) by semi-dry electroblotting (1 W, at 4 °C overnight) with a transfer  
215 chamber from Bio-Rad (Hercules, CA, USA). The transferred proteins were blocked with a  
216 blocking solution consisting of non-fat dry milk (5/95, w/v) (PanReac AppliChem ITW reagents,  
217 Darmstadt, Germany) in 0.05 % Tween-20/TBS (0.05/99.95, v/v) (Medicago, Uppsala, Sweden)  
218 for 1 hour on a mixing plate. The proteins were subsequently stained with primary antibodies (at  
219 4 °C overnight) in blocking solution and with secondary antibodies in blocking solution for 2  
220 hours at room temperature (RT) with rocking. The antibodies CD9 (10626D), CD63 (two  
221 10628D batches) and CD81 (MA5-13548 and 10630D) were purchased from Thermo Fisher  
222 Scientific. The antibody TSG101 (T5701) was purchased from Sigma-Aldrich, and anti-flotillin-1  
223 (610821) and anti-calnexin (610523) antibodies were purchased from BD Biosciences (San Jose,  
224 CA, USA). The secondary antibodies (sc-2954 and sc-2955) were purchased from Santa Cruz  
225 (Dallas, TX, USA). Next, the membranes were further washed with 0.05 % Tween-20-TBS for  
226 30 minutes on a mixing plate. Protein bands were visualized using an ECL-prime from GE  
227 Healthcare (Buckinghamshire, UK) and Transparency films from Nobo (integrated part of ACCO  
228 Brands Corporation, Lake Zurich, IL, USA). The bands were developed in a Chemidoc<sup>TM</sup> touch  
229 imaging system (Bio-Rad). The antibodies actin (A2066, from Sigma) and GAPDH (sc-32233,  
230 from Santa Cruz) were used as a positive control (results not shown).

231

## 232 **2.8 Immunogold labelling and transmission electron microscopy**

233 One drop of 5-50  $\mu$ L of the isolates was placed on clean Parafilm, and the formvar coated copper  
234 grid (100 square mesh) was carefully placed to float on the drop with the coated side facing the  
235 suspension. The material was allowed to adsorb for 5-20 minutes, before rinsing on two large

236 drops of PBS for 5 minutes followed by incubation on a drop (8  $\mu$ L) of the primary anti-CD9  
237 (PA5-11559) from Thermo Fisher Scientific (diluted 1+ 9 with fish serum gelatine (FSG)/PBS  
238 (1/99, v/v)). Next the grids were again washed on two large drops of PBS for 5 minutes and  
239 incubated on a drop (5  $\mu$ L) of rabbit anti-mouse antibody (Z0259, Dako Glostrup, Denmark)  
240 (diluted 1:200 with the FSG in PBS solution) for 25 minutes, before repeating the washing on  
241 two drops of PBS for 5 minutes. Prior to gold labelling, the grid was incubated for 20 minutes on  
242 one drop of the diluted protein A-gold solution (1:50 in the FSG in PBS solution) (10 nm gold  
243 particle size), from Cell Microscopy Core (CMC, University Medical Center Utrecht, Utrecht,  
244 The Netherlands). A final wash on 5 drops of PBS (2 minutes) followed by 5 drops of water (3  
245 minutes) was performed before negative staining with uranyl acetate/water (4/96, w/v) for 2  
246 minutes. Excess fluid was removed, and the grids were stored in a storage box at RT until use.  
247 The samples were visualized with a JEM-1400Plus transmission electron microscope from JEOL  
248 (Tokyo, Japan) and images were recorded at 80 kV.

249

## 250 **2.9 Dynamic light scattering**

251 The DLS experiments were conducted with the aid of an ALV/CGS-8F multi-detector version  
252 compact goniometer system, with 8 fiber-optical detection units, from ALV-GmbH, Langen,  
253 Germany. The beam from a Uniphase cylindrical 22 mW HeNe-laser, operating at a wavelength  
254 of 632.8 nm with vertically polarized light, was focused on the sample cell (10-mm NMR tubes,  
255 Wilmad Glass Co., of highest quality) through a temperature-controlled cylindrical quartz  
256 container (with 2 plane-parallel windows), vat (the temperature constancy being controlled to  
257 within  $\pm 0.01$  °C with a heating/cooling circulator), which is filled with a refractive index  
258 matching liquid (*cis*-decalin). The isolates were filtered in an atmosphere of filtered air through a

259 5  $\mu\text{m}$  filter (Millipore) directly into precleaned NMR tubes. The measurements were carried out  
260 at 25 °C. The measurements revealed two relaxation modes, one fast and one slow mode. This  
261 suggests that there is a coexistence between single entities and aggregates in the solution. The  
262 analyses of the correlation function data are presented in **Supplemental Methods (S-6 DLS)**.

263

## 264 **2.10 Protein digestion**

### 265 *2.10.1 In-gel digestion*

266 Prior to in-gel digestion, the isolates (from **Section 2.5** and **Section 2.6**) were prepared and run  
267 using the same procedures as with the gel electrophoresis described in **Section 2.7**. The gel was  
268 covered by a fixation buffer (water/methanol/acetic acid, 40/50/10, v/v/v) overnight (18 hours at  
269 4 °C), stained with Coomassie brilliant blue for 4 hours at RT and destained overnight with  
270 water. The gel was cut to yield four fractions from each gel lane; approximately 0-25 kDa, 25-70  
271 kDa, 70-130 kDa (70-250 for BC samples) and 130-up kDa (250-up kDa for BC samples). Each  
272 fraction was transferred to Protein LoBind tubes. The fractions were further reduced, alkylated  
273 and digested using the protocol of Shevchenko et al. (55), with trypsin from Promega Biotech AB  
274 (Nacka, Sweden). The digested fractions were evaporated to dryness and dissolved in 15  $\mu\text{L}$  0.1  
275 % formic acid (FA) (water/FA, 99.9/0.1, v/v).

276

### 277 *2.10.2 In-solution digestion with peptide desalting*

278 The isolates (from **Section 2.5** and **Section 2.6**) were evaporated to dryness and dissolved in 25  
279  $\mu\text{L}$  6 M urea in 100 mM ammonium bicarbonate (ABC). Subsequently, the isolates were reduced  
280 with 9.5 mM DTT (30 minutes at 30 °C) and alkylated with 25 mM 2-iodoacetamide (IAM, 60  
281 minutes, at RT and in the dark). The reduction with DTT was repeated for the BC isolates, with

282 28 mM DTT (30 minutes at 30 °C). The BC isolates were pre-digested by adding 0.1 µg Lys-C  
283 (120 minutes at 37 °C), before the digests (both BC- and GBM isolates) were diluted to a final  
284 concentration of 19 mM ABC. The trypsin digestion was performed with 1 µg trypsin (16 hours  
285 at 37 °C) and the protease activity was terminated with water/FA (99/1, v/v). Desalting and  
286 enrichment of the digests were performed using ZipTip® (silica particles with C<sub>18</sub>) from  
287 Millipore. For the BC digests, ZipTip was wetted with neat ACN and equilibrated with  
288 TFA/water (0.1/99.9, v/v). The digests were desalted by pipetting through the ZipTip. Washing  
289 the ZipTip was performed with water/methanol/TFA (94.9/5/0.1, v/v/v) and the peptides were  
290 eluted with 5 µL water/ACN/TFA (29.9/70/0.1, v/v/v). For the GBM digests, the same procedure  
291 was performed with FA replacing TFA. All desalted digests were evaporated to dryness at 30 °C  
292 and dissolved in 10 µL 0.1 % FA.

293

## 294 **2.11 LC-MS/MS analysis**

295 Unless otherwise stated, the dilutions during sample preparations were performed using water  
296 (HiPerSolv Chromanorm®) from VWR. Proteins digested in-gel were analysed in laboratory 1  
297 and proteins digested in-solution were analysed by laboratory 2.

298

### 299 *2.11.1 LC-MS/MS analysis at laboratory 1*

300 The precolumn (50 µm ID x 20-50 mm) and analytical column (50 µm ID x 150 mm) were  
301 packed with C<sub>18</sub>-Accucore particles (2.6 µm beads, 80 Å pore size) from Thermo Fisher  
302 Scientific, using the developed method as described in our previous study (56). An EASY-nLC  
303 1000 pump (with autosampler) connected to a Q-Exactive™ Orbitrap MS equipped with a  
304 nanoFlex nanospray ion source (Thermo Fisher Scientific) were applied throughout the

305 experiments. Mobile phase A (MP A) was made of 0.1 % FA, while mobile phase B (MP B) was  
306 made of ACN/FA (99.9/0.1, v/v) (mobile phase B, MP B). Trapping of the analytes in the pre-  
307 column was performed with 100 % MP A at a maximum flow rate restricted not to reach above  
308 500 bar (12  $\mu$ L). A 120-minute linear gradient elution from 3-15 % MP B with a flow rate of 130  
309 nL/min was set, starting at 3 % MP B for 3 minutes before the percentage of MP B was increased  
310 to 15 % in 120 minutes. The MP B was increased to 50 % for 5 minutes before the percentage of  
311 MP B increased to 80 % for 2 minutes (flow rate was also increased to 173 nL/min) and kept at  
312 80 % MP B for another 15 minutes. The injection volume was 10  $\mu$ L for each fraction.

313  
314 The eluting peptides were ionized at 1.8 kV at 250 °C for the BC isolates and at 275 °C for the  
315 GBM isolates. The MS was operated in data-dependent (dd) positive mode to automatically  
316 switch between MS and MS/MS acquisition. Survey full scan MS spectra (with a mass filter of  
317  $m/z$  350 to 1850) were acquired with a resolution of 70 000, automatic gain control (AGC) of  
318  $1 \times 10^6$  and a maximum injection time of 120 ms. For dd/MS/MS, the resolving power was set to  
319 17 500, the AGC to  $1 \times 10^5$  and the maximum injection time to 60 ms. Charges of 1, 7 or  $\geq 8$  were  
320 excluded and dynamic exclusion was set to 70.0 seconds. The method allowed sequential  
321 isolation of up to the ten most intense ions depending on signal intensity (intensity threshold 2.0  
322  $\times 10^4$ ), with isolation window of  $m/z$  1.8.

323  
324 *2.11.2 LC-MS/MS analysis at laboratory 2*  
325 The analytical column applied was an Acclaim PepMap 100 column ( $C_{18}$ , 3  $\mu$ m beads, 100  $\text{\AA}$ , 75  
326  $\mu$ m ID x 500 mm), and an Ultimate 3000 nano ultra-HPLC system from Dionex (Sunnyvale, CA,  
327 USA) was used in combination with a Q-Exactive<sup>TM</sup> Orbitrap MS equipped with a nanoFlex

328 nanospray ion source from Thermo Fisher Scientific. The MP A was 0.1 % FA and the MP B was  
329 ACN/FA/water (90/0.1/9.9, v/v/v). A 207 minute linear gradient elution from 4-35 % MP B with  
330 a flow rate of 300 nL/min was set. The percentage of MP B was increased to 50 % in 20 minutes  
331 and 80 % MP B in 2 minutes. The injection volume was 5  $\mu$ L.

332  
333 The MS was operated in data-dependent (dd) positive mode. Survey full scan MS spectra (with a  
334 mass filter of  $m/z$  400 to 1700) were acquired with a resolution of 70 000, AGC of  $3 \times 10^6$  and  
335 maximum injection time of 100 ms. In dd/MS/MS, the resolving power was set to 35 000 and the  
336 maximum injection time to 120 ms. The dynamic exclusion was set to 60 seconds. The method  
337 allowed sequential isolation of up to the ten most intense ions depending on signal intensity  
338 (intensity threshold  $1.7 \times 10^4$ ) and the isolation window was  $m/z$  2 without offset.

339  
340 *2.11.3 Data processing and protein identification*

341 Chromatograms and mass spectra were obtained by Xcalibur<sup>TM</sup> Software (version 2.1, Thermo  
342 Fisher Scientific), and the search engine Proteome Discoverer<sup>TM</sup> Software (version 1.4.0.228,  
343 Thermo Fisher Scientific) was used to identify the peptides and proteins. The proteins were  
344 identified using both SEQUEST and MASCOT algorithms searching the Swiss-Prot database  
345 (human taxonomy, April 2017 (20 198 entries) and June 2017 (20 205 entries) for BC- and GBM  
346 isolates, respectively). All searches were performed setting the digestion enzyme to trypsin with  
347 maximum two missed cleavages, fragment ion mass tolerance of 0.1 Da and a precursor mass  
348 tolerance of 10 ppm. Signal to noise (S/N) threshold was set to 1.5 and the minimum ion count to  
349 1. An automatic decoy search was performed with a false discovery rate (FDR) threshold of 0.01  
350 (strict) and 0.05 (relaxed). Carbamidomethylation of cysteine was specified as static

351 modification. Oxidation of methionine, acetylation of the protein N-terminus and deamidation of  
352 glutamine and asparagine were specified as dynamic modifications. The proteins were identified  
353 with high peptide confidence filter, and  $\geq 1$  signature peptide was required for all protein  
354 identifications. Proteins identified as keratin or trypsin were removed from the list, in addition to  
355 proteins found in the blank samples.

356

## 357 **2.12 Experimental Design and Statistical Rationale**

### 358 *GBM procedures*

359 For GBM samples, 3 kit- and UC isolation replicates were used for the UV-Vis  
360 spectrophotometry (one replicate excluded in **Section 3.1** due to uncertainty in the isolation  
361 volume) and LC-MS/MS analysis in both laboratories (all isolates divided in two, no injection  
362 replicates due to low protein amounts). For TEM analysis, one isolation replicate from both  
363 isolation methods are presented. From the isolation replicate, 2 technical replicates were analysed  
364 with TEM. Three additional UC isolation replicates from a second batch were performed for  
365 verification, and SW480 isolates were used as a positive control (result not shown). For the DLS  
366 analysis, only one isolation replicate was performed since the particle sizes obtained in the DLS  
367 analysis were in correspondence with that seen by TEM analysis. For the WB analyses of  
368 exosome isolates, 1-2 replicates for each antibody are presented (**Figure WB.7 in Supplemental**  
369 **Western Blots**), and 3 replicates from a second batch of UC isolates were performed for  
370 confirmation and investigation of the repeatability (**Figure WB.9 in Supplemental Western**  
371 **Blots**). For WB analysis of GBM cells, 6 replicates were used (three replicates from two cell  
372 batches) with the antibodies for actin or GAPDH used as a loading control (result not shown). A



373 kit blank and UC blank were used as negative controls for all exosome analyses (except of no kit  
374 blank for the DLS analysis).

375

376

377 *BC procedures*

378 For BC samples, 3 kit- and 2 UC isolation replicates were used for the protein measurement by  
379 UV-Vis spectrophotometry. For the TEM, one isolation replicate and 2 technical replicates were  
380 analysed, in addition to a positive control (SW480 isolate, results not shown). DLS analyses were  
381 performed with the use of 2 isolation replicates (kit), 3 isolation replicates (UC) and one blank  
382 isolation replicate (isolated with both isolation methods). For the WB analyses, 3 kit- and 2 UC  
383 isolation replicates were used. WB analyses of BC cells were also performed, using 3 cell  
384 replicates (results not shown). The antibodies for actin or GAPDH were used as loading controls  
385 for the cells (results not shown) and anti-TSG101 was used as a loading control for the isolates.  
386 Prior to LC-MS/MS, 2 isolation replicates were analysed in laboratory 1 (digested in-gel) and one  
387 isolation replicate was analysed in laboratory 2 (in-solution digested) (no injection replicates due  
388 to low protein amount). One blank isolation replicate (isolated with both isolation methods) was  
389 used for analysis with LC-MS/MS in each of the two laboratories.

390

### 391 **3 Results and Discussion**

392 For comparison of the two exosome isolation methods (UC and Total Exosome Isolation Reagent  
393 (kit)) using GBM (T1018) and BC (MDA-MB-231) cell culture media, common characterization  
394 methods were used and evaluated for their ability to prove the presence of exosomes and/or  
395 determine the purity. The standard techniques TEM, for morphological analysis, and WB, for

396 exosome marker analysis, were used in addition to the measurement of total protein amount, DLS  
397 and LC-MS/MS. Comprehensive proteome analysis using LC-MS/MS was applied to  
398 complement WB for detecting exosome protein markers (hereafter referred to as exosome  
399 markers), and additional positive and negative markers were included.

### 400 **3.1 Similar content of protein measured in kit- and UC isolates**

401 The protein amount per million cells (hereafter referred to as protein amount) in the BC- (**Figure**  
402 **1A**) and GBM (**Figure 1B**) isolates was measured using UV-Vis spectrophotometry (with  
403 absorbance at 562 nm). The total protein amount measured for kit isolates was 15-28 times higher  
404 than for UC isolates. A higher protein amount in exosomes isolated by the kit compared to that  
405 by UC were also observed in a study by Van Deun et al., who compared UC to the same isolation  
406 kit used in the present study for MCF7 derived exosomes (57). However, the measured  
407 absorbance in the kit blanks (i.e. cell culture medium grown without cells and isolated by kit) was  
408 high in comparison to UC blanks (i.e. cell culture medium grown without cells and isolated by  
409 UC), where the absorbance was below the limit of quantification. The high absorbance in the kit  
410 blanks could indicate protein contaminations. When correcting for the blank (subtracting the  
411 protein amount measured in blank samples from the protein amount in exosome isolates), the  
412 measured protein content for exosomes isolated by the kit and UC was similar.

413

### 414 **3.2 TEM and DLS detected vesicles in the expected size range for exosomes**

415 Morphological analysis of the exosome samples was performed using TEM and immunogold  
416 labelling of CD9. In addition, the hydrodynamic particle size distribution was measured using  
417 DLS analysis. Clusters of vesicles were observed in the micrographs of the samples isolated with  
418 both kit and UC (**Figure 2**). Vesicle structures similar to that described in literature were

419 observed (6, 58, 59). The DLS experiments disclosed the coexistence of two populations of  
420 moieties, single entities and clusters, both with a narrow size distribution.

421

### 422 3.2.1 GBM exosomes

423 No CD9-labelling was observed for the vesicle structures observed in the GBM isolates (**Figure**  
424 **2AI** and **2AIII**) and the presence of a membrane enclosing the vesicles could not be confirmed.

425 Compared to the kit isolates, the UC isolates presented more distinct double membranes in the  
426 expected size range for exosomes. The blank samples for both isolation methods did not display

427 membrane structures (**Figure 2AII** and **2AIV**). The absence of vesicles was further confirmed by

428 DLS analysis of the UC blank (**Figure 2B**). The DLS-analysis of the GBM isolates exhibited

429 particles of similar sizes of 51 and 73 nm (mean) with both isolation methods (**Figure 2B**). Thus,

430 both isolation methods gave rise to comparable exosome populations.

431

### 432 3.2.2 BC exosomes

433 Several of the BC vesicle structures were CD9-labelled (**Figure 2CI** and **2CIII**). CD9-labelled  
434 vesicles have also been observed in a previous study of the same cell line (60). Notably, the blank

435 isolates displayed contamination (**Figure 2CII** and **2CIV**), e.g. exosome-resembling vesicles

436 were found in the UC blank (red dashed circles). However, no contaminations were found in the

437 UC blank using DLS, while the kit blank displayed 67 nm (mean) contaminations (**Figure 2D**).

438 The DLS analysis also presented two distinct particle diameters in kit isolates (28 and 95 nm,

439 mean values) while only one particle diameter was present in UC isolates (137 nm, mean value),

440 indicating differences in the particle sizes isolated with the two isolation methods.

441

442 The sizes observed with DLS correlates well with that found in other studies (30–250 nm) (13,  
443 57, 61-65). In conclusion, the isolates showed structures resembling those of EVs, but some  
444 blank were not entirely devoid of vesicles or particles. Observations made with TEM are not  
445 necessarily detectable with DLS because TEM analyses dry material, whereas DLS measures on  
446 solutions or suspensions of particles. In addition, the micrographs taken with TEM display a  
447 narrow section of the grid, which again represents only a small part of the isolate.

448

### 449 **3.3 Western blot analyses indicated the presence of exosomes, but detected impurities** 450 **exclusively in the GBM exosome isolates**

451 According to ISEV, for characterization of exosomes at least three exosome markers should be  
452 included; transmembrane proteins (e.g. tetraspanins), cytosolic proteins (e.g. TSG101 or  
453 annexins) and negative markers (e.g. calnexin) (45). In the present study, WB was performed  
454 using antibodies for a selection of positive exosome markers (the tetraspanins CD81, CD9 and  
455 CD63, TSG101 and flotillin-1). Calnexin was selected as a negative marker for purity evaluation  
456 as recommended by ISEV. This protein is located at the endoplasmic reticulum (ER) and has  
457 been absent in exosome samples in some studies (45, 61). Hence, the presence of calnexin is  
458 assumed to signalize ER-contamination. Thus, contaminations from other cellular organelles  
459 cannot be excluded.

460

#### 461 *3.3.1 GBM exosomes*

462 For the GBM cells and exosomes, positive and negative exosome markers were detected in  
463 isolates from both kit- and UC. The positive marker CD81 was only found in the UC isolate from  
464 the first batch (**Figure 3**). The WB-bands were also more apparent for most positive markers for

465 exosomes isolated by UC (lower protein amount loaded than for the kit isolates), and thus is in  
466 accordance with the study of Van Deun et al. (57). The kit isolate bands were also circular, which  
467 implies higher detection uncertainty.

468

### 469 3.3.2 BC exosomes

470 For the BC cells and exosomes, inconsistency on the presence of several positive exosome  
471 markers were observed between the kit and UC isolates (**Figure 3**). The positive marker CD63  
472 was only detected in kit isolates, while CD81 was only detected in UC isolates (similar to GBM  
473 exosomes). The proteins TSG101, flotillin-1 and CD9 (barely visible in the UC isolates) were  
474 detected using both isolation methods. However, Harris et al. did not detect TSG101 using WB  
475 on BC exosomes isolated by UC (13). The proteins CD9, CD81 and flotillin-1 were detected in  
476 other WB-studies of UC isolates from the same cell line (24, 66, 67).

477

478 The reason for the variation in tetraspanin appearance in the BC kit- and UC isolates could be due  
479 to protein concentrations below detection limits or poor antibody quality (see **Figure 3**). Several  
480 antibodies for CD63 and CD81 (different batch number/catalog number) were tested for the BC  
481 isolates before a signal was obtained (signal obtained for CD81 using catalog number 10630D),  
482 and this could indicate poor antibody quality. On the other hand, the WB was performed under  
483 reducing conditions. When the epitope binds to cysteine-conserved protein domains (i.e.  
484 tetraspanins), performing WB under non-reducing conditions is more commonly selected. The  
485 stronger signals for the kit isolates from BC could be due to the higher loaded protein amount.  
486 Nevertheless, the presence of positive markers indicates the presence of exosomes in the isolates  
487 obtained using both methods. The absence of calnexin in BC exosomes from both isolation

488 methods indicates that the isolates are not contaminated with the ER. However, only one negative  
489 marker is insufficient to exclude cell organelle impurities. Further investigation by implementing  
490 more comprehensive methods like LC-MS/MS was therefore considered to be beneficial.

491

### 492 **3.4 LC-MS/MS studies confirmed and complemented the WB study**

493 LC-MS/MS was performed to confirm the WB observations, using in-house packed nano  
494 separation columns (laboratory 1, (56)) and a commercial column (laboratory 2). One positive  
495 marker (annexin A2) and one negative marker (serine/threonine-protein kinase 26) were added to  
496 complement the WB study. The identification of the selected exosome markers using LC-MS/MS  
497 is presented in **Table 1**, with chromatograms and MS/MS spectra of a CD9 signature peptide  
498 (BC, **Figure 4A**) and calnexin signature peptide (GBM, **Figure 4B**). Similar to the WB analysis,  
499 the same tetraspanins including calnexin observed in kit and UC isolates were identified in the  
500 GBM exosomes using LC-MS/MS. However, the tetraspanins identified from kit isolates were  
501 only found in one replicate, indicating low concentrations and high detection uncertainty.  
502 Flotillin-1 was also identified with LC-MS/MS, but only for UC isolates. TSG101 was not  
503 identified in neither kit nor in UC isolates with GBM exosomes using LC-MS/MS, in  
504 contradiction to that found by WB.

505

506 For the BC exosomes, the findings by LC-MS/MS analysis was contradictory to the trend  
507 observed in the WB analysis, where kit isolates provided higher intensity bands for positive  
508 markers than the UC isolates. Using LC-MS/MS, several positive markers were not found in the  
509 kit isolates when injecting similar amounts of protein as for UC isolates (**Table 1**). The reason for  
510 the difference in the identified proteins between LC-MS/MS and WB could hence be partially

511 due to higher protein amount loaded onto the gel for kit isolates (see **Figure 3**). Calnexin was not  
512 found in the BC isolates using LC-MS/MS, similar to that observed by WB. Annexin A2  
513 (positive marker) was found in all isolates and serine/threonine-protein kinase 26 (second  
514 negative marker) was not detected in any isolates.

515  
516 Other negative markers from peroxisomes (PMP70), mitochondria (prohibitin-1, hexokinase-2  
517 and mitochondrial phosphoenolpyruvate carboxykinase [GTP]), Golgi apparatus (GM130,  
518 translocation protein SEC62, translocation protein SEC63 and protein disulfide-isomerase  
519 TMX3), nucleus (Bcl-2-associated transcription factor 1 and c) and ER (calreticulin), as used in  
520 other studies (57, 68), were not detected in any BC isolates in our study (only translocation  
521 protein SEC63 and protein disulfide-isomerase TMX3 detected in the GBM isolates). In the BC  
522 isolates, the absence of the selected negative markers can imply low cell organelle contamination.

523

### 524 **3.5 GO annotations revealed proteins annotated to cell organelles in BC exosomes**

525 However, the possibility of protein contaminants being present in BC isolates cannot be  
526 excluded. Other general proteins related to e.g. the nucleus, Golgi apparatus, mitochondrion and  
527 ER were indeed identified in the BC exosomes using LC-MS/MS and gene ontology (GO)  
528 annotations (**Figure 5**). The proteins identified in BC isolates were classified based on their GO  
529 annotations to different cellular localizations, where one protein can be annotated to several  
530 cellular localizations. Out of the 668 proteins identified in the UC isolates and 814 in the kit  
531 isolates, 615 and 749 DAVID ID`s were annotated to selected cellular localizations. Both  
532 isolation methods generated isolates enriched in exosome related proteins. Several proteins were  
533 annotated to the cellular organelles mitochondria (11-13 %), ER (6-8 %) and Golgi apparatus (7

534 %). Interestingly, 35-42 % of the proteins were also annotated to the nucleus (e.g. histones),  
535 which seems to imply impure exosome isolates (45). On the other hand, a high percentage (20-40  
536 %) of other proteins related to the nucleus has also been found in isolates from other studies (69,  
537 70). The presence of cell organelle annotated proteins could point toward cellular impurities in  
538 the isolates, which would not have been discovered by targeted protein characterization methods  
539 (e.g. WB). However, there is not sufficient knowledge on whether cell organelle proteins derive  
540 exclusively from cell impurities, or if they occur naturally in EVs. To summarize, from our point  
541 of view, complete information about exosome purity cannot be obtained by any of the common  
542 characterization techniques used today, and one can argue that the term “exosome isolation” can  
543 be misleading.

544

### 545 **3.6 The number of cancer related proteins identified was dependent on the isolation** 546 **method and cell source**

547 The total number of proteins identified in the GBM and BC isolates using LC-MS/MS is  
548 presented in the Venn diagrams in **Figure 6** (see **Supplemental Proteins** for a list of all  
549 identified proteins). For the GBM isolates, the number of identified proteins reflects the findings  
550 in both WB and LC-MS/MS exosome marker investigations. UC isolates provided more unique  
551 proteins than the kit isolates (75 % higher number of identified proteins). An increased number of  
552 potential biomarkers for GBM (e.g. heat shock proteins 70 kDa and 90 kDa (71-73), chondroitin  
553 sulfate proteoglycan 4 (71, 74), CD44 (71, 74, 75) and CD276 (76)) were also identified in the  
554 UC isolates compared to the kit isolates using LC-MS/MS. The identification of relevant  
555 biomarkers is of great interest for further studies on exosomes. However, the identified



556 biomarkers cannot exclusively be related to exosomes due to the presence of negative exosomes  
557 markers indicating cellular contaminations with both isolation methods.

558  
559 For the BC exosomes, the opposite was observed; kit isolates provided 12 % higher number of  
560 identified proteins than UC isolates. However, there was no correlation between the injected  
561 protein amount or the starting volume used for isolation, and the number of identified proteins  
562 with kit or UC for the BC exosomes (result not shown). Thus, the reason for the variation in the  
563 number of identified proteins between the two cell sources and isolation methods is unknown.  
564 The identification of biomarkers related to triple negative breast cancer (e.g. histone H4 (77), heat  
565 shock 90 kDa  $\alpha$  and  $\beta$  protein (78), calmodulin and epidermal growth factor receptor (79)) was  
566 similar for both isolation methods (see **Supplemental Proteins**).

567  
568 When comparing cell sources, the number of identified proteins was lower in GBM isolates than  
569 BC isolates, but the number of identified proteins for GBM isolates is comparable to another LC-  
570 MS/MS study on GBM exosomes (80).

571  
572 **3.7 Choosing the proper exosome isolation method is not straight forward**

573 A complete comparison of the characteristics of the two exosome isolation methods is given in  
574 **Table 2**. For all isolates, the kit and UC isolates displayed similarities and differences.

575  
576 *3.7.1 GBM exosomes*

577 For the GBM exosomes, one of the positive markers detected in the UC isolates (CD81) was not  
578 found in kit isolates by WB. In TEM, double membrane structures were more defined in the UC

579 isolates, but the existence of double membranes cannot be excluded by looking at the  
580 micrographs from the kit isolates. The largest differences between the two isolation methods for  
581 the GBM exosomes were found by the LC-MS/MS studies (positive markers and number of  
582 identified proteins). All tetraspanins investigated were identified in the UC isolates in several  
583 replicates. In the kit isolates, CD81 was not found, and the detected tetraspanins (CD63 and CD9)  
584 were only found in one replicate each. A larger number of proteins and biomarker candidates  
585 were also identified in the UC isolates compared to kit isolates. However, the negative marker  
586 calnexin was detected in more replicates for the UC than the kit using LC-MS/MS. In total, from  
587 **Table 2**, UC appear to be the method of choice for isolation of GBM cell culture exosomes.

588

### 589 3.7.2 BC exosomes

590 For the BC exosomes, there was a slight difference in favor of the kit method regarding the  
591 number of positive markers found by WB and the number of identified proteins (LC-MS/MS).  
592 However, using LC-MS/MS, more positive protein markers were found in the UC isolates in  
593 contrary to what was found by WB. For the UC isolates, TEM presented double membrane  
594 structures with more CD9-labelling. However, the micrograph displays an extremely small part  
595 of the whole sample. The isolation methods also performed similarly regarding biomarker  
596 identifications. Thus, for BC exosome isolation there is no obvious reason for choosing one  
597 method over the other, even though there were some differences in the characteristics (i.e. the  
598 identified protein content- and amount, CD9-labelled vesicles, particle sizes) of the isolated  
599 exosomes by kit and UC.

600

601 The sample volume (e.g. of cell culture medium) and number of samples should also be taken  
602 into consideration when choosing the proper isolation method. For the UC isolation, higher  
603 starting volumes can be used compared to isolation with kit, while the kit are more compatible  
604 with lower starting volumes (81). The high cost of ultracentrifuges has larger impact when a  
605 smaller number of samples are to be isolated with UC. On the other hand, larger sample numbers  
606 increase the cost for kit isolations due to reagent consumption.

607

#### 608 **4 Conclusions**

609 The observations made in our study (summarized in **Table 2**) support the view that exosome  
610 isolation depends on the isolation protocol used, differences in the behavior of exosomes between  
611 cell sources, characterization methods and the conditions applied (82). Hence, we suggest that the  
612 application area (e.g. determine exosome purity or for biomarker discovery) and sample volumes  
613 available for the exosome isolation should be strong determining factors when selecting the  
614 proper isolation method. The characterization methods used in this study are not able to  
615 distinguish exosomes from cellular contaminations and other vesicles, but the untargeted  
616 proteome analyses using LC-MS/MS provided more extensive and versatile information on the  
617 protein content of the samples than targeted WB of a few proteins. Consequently, we suggest that  
618 LC-MS/MS should be implemented to a higher extent regarding exosome characterization.  
619 Considering our findings, it is important to state that the term “exosome enrichment” is more  
620 appropriate than “exosome isolation”.

621

## 622 **5 Acknowledgements**

623 This work was supported by the Department of Chemistry, University of Oslo, Norway. We  
624 would like to acknowledge DIATECH@UiO, since parts of this work have been carried out  
625 within this strategic research initiative at the Faculty of Mathematics and Natural Sciences,  
626 University of Oslo. This work has also been supported by the UiO:Life Science funded  
627 convergence environment “Organ on a chip and nano-devices”.

628

629

630

## 631 **6 References**

- 632 1. Théry, C., Zitvogel, L., and Amigorena, S. (2002) Exosomes: composition, biogenesis and  
633 function. *Nature Reviews Immunology* 2, 569
- 634 2. Lener, T., Gimona, M., Aigner, L., Borger, V., Buzas, E., Camussi, G., Chaput, N.,  
635 Chatterjee, D., Court, F. A., del Portillo, H. A., O'Driscoll, L., Fais, S., Falcon-Perez, J. M.,  
636 Felderhoff-Mueser, U., Fraile, L., Gho, Y. S., Gorgens, A., Gupta, R. C., Hendrix, A., Hermann, D.  
637 M., Hill, A. F., Hochberg, F., Horn, P. A., de Kleijn, D., Kordelas, L., Kramer, B. W., Kramer-Albers,  
638 E. M., Laner-Plamberger, S., Laitinen, S., Leonardi, T., Lorenowicz, M. J., Lim, S. K., Lotvall, J.,  
639 Maguire, C. A., Marcilla, A., Nazarenko, I., Ochiya, T., Patel, T., Pedersen, S., Pocsfalvi, G.,  
640 Pluchino, S., Quesenberry, P., Reischl, I. G., Rivera, F. J., Sanzenbacher, R., Schallmoser, K.,  
641 Slaper-Cortenbach, I., Strunk, D., Tonn, T., Vader, P., van Balkom, B. W. M., Wauben, M., El  
642 Andaloussi, S., Thery, C., Rohde, E., and Giebel, B. (2015) Applying extracellular vesicles based  
643 therapeutics in clinical trials - an ISEV position paper. *J. Extracell. Vesicles* 4, 31
- 644 3. Zhao, H., Yang, L., Baddour, J., Achreja, A., Bernard, V., Moss, T., Marini, J. C., Tudawe, T.,  
645 Seviour, E. G., San Lucas, F. A., Alvarez, H., Gupta, S., Maiti, S. N., Cooper, L., Peehl, D., Ram, P.  
646 T., Maitra, A., and Nagrath, D. (2016) Tumor microenvironment derived exosomes  
647 pleiotropically modulate cancer cell metabolism. *eLife* 5, e10250
- 648 4. Skotland, T., Sandvig, K., and Llorente, A. (2017) Lipids in exosomes: Current knowledge  
649 and the way forward. *Progress in Lipid Research* 66, 30-41
- 650 5. Beach, A., Zhang, H.-G., Ratajczak, M. Z., and Kakar, S. S. (2014) Exosomes: an overview  
651 of biogenesis, composition and role in ovarian cancer. *Journal of Ovarian Research* 7, 14-14
- 652 6. Li, P., Kaslan, M., Lee, S. H., Yao, J., and Gao, Z. (2017) Progress in Exosome Isolation  
653 Techniques. *Theranostics* 7, 789-804
- 654 7. Becker, A., Thakur, B. K., Weiss, J. M., Kim, H. S., Peinado, H., and Lyden, D. (2016)  
655 Extracellular Vesicles in Cancer: Cell-to-Cell Mediators of Metastasis. *Cancer Cell* 30, 836-848

- 656 8. Pocsfalvi, G., Stanly, C., Fiume, I., and Vekey, K. (2016) Chromatography and its  
657 hyphenation to mass spectrometry for extracellular vesicle analysis. *J. Chromatogr. A* 1439, 26-  
658 41
- 659 9. Farahani, M., Rubbi, C., Liu, L., Slupsky, J. R., and Kalakonda, N. (2015) CLL exosomes  
660 modulate the transcriptome and behaviour of recipient stromal cells and are selectively  
661 enriched in miR-202-3p. *PloS one* 10, e0141429
- 662 10. Logozzi, M., De Milito, A., Lugini, L., Borghi, M., Calabro, L., Spada, M., Perdicchio, M.,  
663 Marino, M. L., Federici, C., Iessi, E., Brambilla, D., Venturi, G., Lozupone, F., Santinami, M.,  
664 Huber, V., Maio, M., Rivoltini, L., and Fais, S. (2009) High Levels of Exosomes Expressing CD63  
665 and Caveolin-1 in Plasma of Melanoma Patients. *Plos One* 4, 10
- 666 11. Parolini, I., Federici, C., Raggi, C., Lugini, L., Palleschi, S., De Milito, A., Coscia, C., Iessi, E.,  
667 Logozzi, M., Molinari, A., Colone, M., Tatti, M., Sargiacomo, M., and Fais, S. (2009)  
668 Microenvironmental pH Is a Key Factor for Exosome Traffic in Tumor Cells. *J. Biol. Chem.* 284,  
669 34211-34222
- 670 12. Peinado, H., Alečković, M., Lavotshkin, S., Matei, I., Costa-Silva, B., Moreno-Bueno, G.,  
671 Hergueta-Redondo, M., Williams, C., García-Santos, G., and Ghajar, C. M. (2012) Melanoma  
672 exosomes educate bone marrow progenitor cells toward a pro-metastatic phenotype through  
673 MET. *Nature medicine* 18, 883-891
- 674 13. Harris, D. A., Patel, S. H., Gucek, M., Hendrix, A., Westbroek, W., and Taraska, J. W.  
675 (2015) Exosomes released from breast cancer carcinomas stimulate cell movement. *PloS one* 10,  
676 e0117495
- 677 14. DeSantis, C. E., Lin, C. C., Mariotto, A. B., Siegel, R. L., Stein, K. D., Kramer, J. L., Alteri, R.,  
678 Robbins, A. S., and Jemal, A. (2014) Cancer treatment and survivorship statistics, 2014. *CA: A*  
679 *Cancer Journal for Clinicians* 64, 252-271
- 680 15. Redig, A. J., and McAllister, S. S. (2013) Breast cancer as a systemic disease: a view of  
681 metastasis. *Journal of Internal Medicine* 274, 113-126
- 682 16. Touat, M., Duran-Pena, A., Alentorn, A., Lacroix, L., Massard, C., and Idbaih, A. (2015)  
683 Emerging circulating biomarkers in glioblastoma: promises and challenges. *Expert Rev. Mol.*  
684 *Diagn.* 15, 1311-1323
- 685 17. Molina, J. R., Hayashi, Y., Stephens, C., and Georgescu, M. M. (2010) Invasive  
686 Glioblastoma Cells Acquire Stemness and Increased Akt Activation. *Neoplasia* 12, 453-U437
- 687 18. Preusser, M., de Ribaupierre, S., Wohrer, A., Erridge, S. C., Hegi, M., Weller, M., and  
688 Stupp, R. (2011) Current Concepts and Management of Glioblastoma. *Ann. Neurol.* 70, 9-21
- 689 19. Jan Chrastina, Z. N., Milan Brazdil, Marketa Hermanova (2015) Glioblastoma multiforme  
690 in a patient with isolated hemimegalencephaly. *Journal of Neurological Surgery Reports* 76, 160-  
691 163
- 692 20. Shao, H. L., Chung, J., Lee, K., Balaj, L., Min, C., Carter, B. S., Hochberg, F. H., Breakefield,  
693 X. O., Lee, H., and Weissleder, R. (2015) Chip-based analysis of exosomal mRNA mediating drug  
694 resistance in glioblastoma. *Nat. Commun.* 6, 9
- 695 21. Best, M. G., Sol, N., Zijl, S., Reijneveld, J. C., Wesseling, P., and Wurdinger, T. (2015)  
696 Liquid biopsies in patients with diffuse glioma. *Acta Neuropathol.* 129, 849-865
- 697 22. Cristofanilli, M., Budd, G. T., Ellis, M. J., Stopeck, A., Matera, J., Miller, M. C., Reuben, J.  
698 M., Doyle, G. V., Allard, W. J., and Terstappen, L. W. (2004) Circulating tumor cells, disease

- 699 progression, and survival in metastatic breast cancer. *New England Journal of Medicine* 351,  
700 781-791
- 701 23. He, M., and Zeng, Y. (2016) Microfluidic Exosome Analysis toward Liquid Biopsy for  
702 Cancer. *Journal of laboratory automation* 21, 599-608
- 703 24. Melo, S. A., Luecke, L. B., Kahlert, C., Fernandez, A. F., Gammon, S. T., Kaye, J., LeBleu, V.  
704 S., Mittendorf, E. A., Weitz, J., and Rahbari, N. (2015) Glypican-1 identifies cancer exosomes and  
705 detects early pancreatic cancer. *Nature* 523, 177-182
- 706 25. Taylor, D. D., and Gercel-Taylor, C. (2008) MicroRNA signatures of tumor-derived  
707 exosomes as diagnostic biomarkers of ovarian cancer. *Gynecologic Oncology* 110, 13-21
- 708 26. Roberg-Larsen, H., Lund, K., Seterdal, K. E., Solheim, S., Vehus, T., Solberg, N., Krauss, S.,  
709 Lundanes, E., and Wilson, S. R. (2017) Mass spectrometric detection of 27-hydroxycholesterol in  
710 breast cancer exosomes. *The Journal of steroid biochemistry and molecular biology* 169, 22-28
- 711 27. Skog, J., Würdinger, T., Van Rijn, S., Meijer, D. H., Gainche, L., Curry, W. T., Carter, B. S.,  
712 Krichevsky, A. M., and Breakefield, X. O. (2008) Glioblastoma microvesicles transport RNA and  
713 proteins that promote tumour growth and provide diagnostic biomarkers. *Nature cell biology*  
714 10, 1470-1476
- 715 28. Hochberg, F. H., Atai, N. A., Gonda, D., Hughes, M. S., Mawejje, B., Balaj, L., and Carter, R.  
716 S. (2014) Glioma diagnostics and biomarkers: an ongoing challenge in the field of medicine and  
717 science. *Expert Rev. Mol. Diagn.* 14, 439-452
- 718 29. Saadatpour, L., Fadaee, E., Fadaei, S., Mansour, R. N., Mohammadi, M., Mousavi, S. M.,  
719 Goodarzi, M., Verdi, J., and Mirzaei, H. (2016) Glioblastoma: exosome and microRNA as novel  
720 diagnosis biomarkers. *Cancer Gene Ther.* 23, 415-418
- 721 30. Mondal, A., Singh, D. K., Panda, S., and Shiras, A. (2017) Extracellular Vesicles As  
722 Modulators of Tumor Microenvironment and Disease Progression in Glioma. *Front. Oncol.* 7, 8
- 723 31. Keller, S., Ridinger, J., Rupp, A.-K., Janssen, J. W., and Altevogt, P. (2011) Body fluid  
724 derived exosomes as a novel template for clinical diagnostics. *Journal of translational medicine*  
725 9, 86
- 726 32. Théry, C., Amigorena, S., Raposo, G., and Clayton, A. (2006) Isolation and  
727 characterization of exosomes from cell culture supernatants and biological fluids. *Current*  
728 *Protocols in Cell Biology*, 3.22. 21-23.22. 29
- 729 33. Cantin, R., Diou, J., Bélanger, D., Tremblay, A. M., and Gilbert, C. (2008) Discrimination  
730 between exosomes and HIV-1: purification of both vesicles from cell-free supernatants. *Journal*  
731 *of Immunological Methods* 338, 21-30
- 732 34. Greening, D. W., Xu, R., Ji, H., Tauro, B. J., and Simpson, R. J. (2015) A protocol for  
733 exosome isolation and characterization: evaluation of ultracentrifugation, density-gradient  
734 separation, and immunoaffinity capture methods. *Proteomic Profiling: Methods and Protocols*,  
735 179-209
- 736 35. Rider, M. A., Hurwitz, S. N., and Meckes Jr, D. G. (2016) ExtraPEG: a polyethylene glycol-  
737 based method for enrichment of extracellular vesicles. *Scientific reports* 6, 23978
- 738 36. Böing, A. N., Van Der Pol, E., Grootemaat, A. E., Coumans, F. A., Sturk, A., and Nieuwland,  
739 R. (2014) Single-step isolation of extracellular vesicles by size-exclusion chromatography. *Journal*  
740 *of Extracellular Vesicles* 3, DOI: 10.3402/jev.v3403.23430

- 741 37. Gámez-Valero, A., Monguió-Tortajada, M., and Carreras-Planella, L. (2016) Size-Exclusion  
742 Chromatography-based isolation minimally alters Extracellular Vesicles' characteristics  
743 compared to precipitating agents. *Scientific Reports* 6, DOI: 10.1038/srep33641
- 744 38. Grant, R., Ansa-Addo, E., Stratton, D., Antwi-Baffour, S., Jorfi, S., Kholia, S., Krige, L.,  
745 Lange, S., and Inal, J. (2011) A filtration-based protocol to isolate human plasma membrane-  
746 derived vesicles and exosomes from blood plasma. *Journal of Immunological Methods* 371, 143-  
747 151
- 748 39. Clayton, A., Court, J., Navabi, H., Adams, M., Mason, M. D., Hobot, J. A., Newman, G. R.,  
749 and Jasani, B. (2001) Analysis of antigen presenting cell derived exosomes, based on immuno-  
750 magnetic isolation and flow cytometry. *Journal of Immunological Methods* 247, 163-174
- 751 40. Yang, J. S., Lee, J. C., Byeon, S. K., Rha, K. H., and Moon, M. H. (2017) Size dependent  
752 lipidomic analysis of urinary exosomes from patients with prostate cancer by flow field-flow  
753 fractionation and nanoflow liquid chromatography-tandem mass spectrometry. *Analytical*  
754 *Chemistry* 89, 2488-2496
- 755 41. Abramowicz, A., Widlak, P., and Pietrowska, M. (2016) Proteomic analysis of exosomal  
756 cargo: the challenge of high purity vesicle isolation. *Mol Biosyst* 12, 1407-1419
- 757 42. Tauro, B. J., Greening, D. W., Mathias, R. A., Mathivanan, S., Ji, H., and Simpson, R. J.  
758 (2013) Two distinct populations of exosomes are released from LIM1863 colon carcinoma cell-  
759 derived organoids. *Molecular & Cellular Proteomics* 12, 587-598
- 760 43. Bhatia, S. N., and Ingber, D. E. (2014) Microfluidic organs-on-chips. *Nature Biotechnology*  
761 32, 760-772
- 762 44. Kreimer, S., Belov, A. M., Ghiran, I., Murthy, S. K., Frank, D. A., and Ivanov, A. R. (2015)  
763 Mass-Spectrometry-Based Molecular Characterization of Extracellular Vesicles: Lipidomics and  
764 Proteomics. *Journal of Proteome Research* 14, 2367-2384
- 765 45. Lötvall, J., Hill, A. F., Hochberg, F., Buzás, E. I., Di Vizio, D., Gardiner, C., Ghossein, Y. S.,  
766 Kurochkin, I. V., Mathivanan, S., Quesenberry, P., Sahoo, S., Tahara, H., Wauben, M. H., Witwer,  
767 K. W., and Théry, C. (2014) Minimal experimental requirements for definition of extracellular  
768 vesicles and their functions: a position statement from the International Society for Extracellular  
769 Vesicles. *J. Extracell. Vesicles* 3, 10.3402/jev.v3i4.26913
- 770 46. Andreu, Z., and Yáñez-Mó, M. (2014) Tetraspanins in Extracellular Vesicle Formation and  
771 Function. *Frontiers in Immunology* 5, 442
- 772 47. Escola, J. M., Kleijmeer, M. J., Stoorvogel, W., Griffith, J. M., Yoshie, O., and Geuze, H. J.  
773 (1998) Selective enrichment of tetraspan proteins on the internal vesicles of multivesicular  
774 endosomes and on exosomes secreted by human B-lymphocytes. *J. Biol. Chem.* 273, 20121-  
775 20127
- 776 48. Kleijmeer, M. J., Stoorvogel, W., Griffith, J. M., Yoshie, O., and Geuze, H. J. (1998)  
777 Selective enrichment of tetraspan proteins on the internal vesicles of multivesicular endosomes  
778 and on exosomes secreted by human B-lymphocytes. *The Journal of Biological Chemistry* 273,  
779 20121-20127
- 780 49. Hessvik, N. P., and Llorente, A. (2018) Current knowledge on exosome biogenesis and  
781 release. *Cellular and Molecular Life Sciences* 75, 193-208
- 782 50. Mathivanan, S., Fahner, C. J., Reid, G. E., and Simpson, R. J. (2012) ExoCarta 2012:  
783 database of exosomal proteins, RNA and lipids. *Nucleic Acids Research* 40, D1241-D1244

- 784 51. Kalra, H., Simpson, R. J., Ji, H., Aikawa, E., Altevogt, P., Askenase, P., Bond, V. C., Borrás,  
785 F. E., Breakefield, X., Budnik, V., Buzas, E., Camussi, G., Clayton, A., Cocucci, E., Falcon-Perez, J.  
786 M., Gabrielsson, S., Gho, Y. S., Gupta, D., Harsha, H. C., Hendrix, A., Hill, A. F., Inal, J. M., Jenster,  
787 G., Kramer-Albers, E. M., Lim, S. K., Llorente, A., Lotvall, J., Marcilla, A., Mincheva-Nilsson, L.,  
788 Nazarenko, I., Nieuwland, R., Hoen, E. N. M., Pandey, A., Patel, T., Piper, M. G., Pluchino, S.,  
789 Prasad, T. S. K., Rajendran, L., Raposo, G., Record, M., Reid, G. E., Sanchez-Madrid, F.,  
790 Schiffelers, R. M., Siljander, P., Stensballe, A., Stoorvogel, W., Taylor, D., Thery, C., Valadi, H., van  
791 Balkom, B. W. M., Vazquez, J., Vidal, M., Wauben, M. H. M., Yanez-Mo, M., Zoeller, M., and  
792 Mathivanan, S. (2012) Vesiclepedia: A Compendium for Extracellular Vesicles with Continuous  
793 Community Annotation. *PLoS Biol.* 10, 5
- 794 52. Kim, D. K., Kang, B., Kim, O. Y., Choi, D. S., Lee, J., Kim, S. R., Go, G., Yoon, Y. J., Kim, J. H.,  
795 Jang, S. C., Park, K. S., Choi, E. J., Kim, K. P., Desiderio, D. M., Kim, Y. K., Lotvall, J., Hwang, D., and  
796 Gho, Y. S. (2013) EVpedia: an integrated database of high-throughput data for systemic analyses  
797 of extracellular vesicles. *J Extracell Vesicles* 2
- 798 53. Vik-Mo, E. O., Sandberg, C., Olstorn, H., Varghese, M., Brandal, P., Ramm-Pettersen, J.,  
799 Murrell, W., and Langmoen, I. A. (2010) Brain tumor stem cells maintain overall phenotype and  
800 tumorigenicity after in vitro culturing in serum-free conditions. *Neuro-Oncology* 12, 1220-1230
- 801 54. ThermoFisher Total Exosome Isolation Reagent (from cell culture media). Waltham, MA,  
802 USA
- 803 55. Shevchenko, A., Tomas, H., Havli, J., Olsen, J. V., and Mann, M. (2007) In-gel digestion for  
804 mass spectrometric characterization of proteins and proteomes. *Nature Protocols* 1, 2856
- 805 56. Berg, H. S., Seterdal, K. E., Smetop, T., Rozenvalds, R., Brandtzaeg, O. K., Vehus, T.,  
806 Lundanes, E., and Wilson, S. R. (2017) Self-packed core shell nano liquid chromatography  
807 columns and silica-based monolithic trap columns for targeted proteomics. *J. Chromatogr. A*  
808 1498, 111-119
- 809 57. Van Deun, J., Mestdagh, P., Sormunen, R., Cocquyt, V., Vermaelen, K., Vandesompele, J.,  
810 Bracke, M., De Wever, O., and Hendrix, A. (2014) The impact of disparate isolation methods for  
811 extracellular vesicles on downstream RNA profiling. *J. Extracell. Vesicles* 3, 24858
- 812 58. Pan, B.-T., Teng, K., Wu, C., Adam, M., and Johnstone, R. M. (1985) Electron microscopic  
813 evidence for externalization of the transferrin receptor in vesicular form in sheep reticulocytes.  
814 *The Journal of Cell Biology* 101, 942-948
- 815 59. Pan, B.-T., and Johnstone, R. M. (1983) Fate of the transferrin receptor during  
816 maturation of sheep reticulocytes in vitro: selective externalization of the receptor. *Cell* 33, 967-  
817 978
- 818 60. Melo, S. A., Sugimoto, H., O'Connell, J. T., Kato, N., Villanueva, A., Vidal, A., Qiu, L., Vitkin,  
819 E., Perelman, L. T., and Melo, C. A. (2014) Cancer exosomes perform cell-independent microRNA  
820 biogenesis and promote tumorigenesis. *Cancer Cell* 26, 707-721
- 821 61. Lobb, R. J., Becker, M., Wen, S. W., Wong, C. S. F., Wiegmans, A. P., Leimgruber, A., and  
822 Moller, A. (2015) Optimized exosome isolation protocol for cell culture supernatant and human  
823 plasma. *J. Extracell. Vesicles* 4, 11
- 824 62. Jenjaroenpun, P., Kremenska, Y., Nair, V. M., Kremenskoy, M., Joseph, B., and Kurochkin,  
825 I. V. (2013) Characterization of RNA in exosomes secreted by human breast cancer cell lines  
826 using next-generation sequencing. *PeerJ* 1, e201



- 827 63. Palazzolo, G., Albanese, N. N., Di Cara, G., Gyax, D., Vittorelli, M. L., and Pucci-Minafra, I.  
828 (2012) Proteomic analysis of exosome-like vesicles derived from breast cancer cells. *Anticancer*  
829 *Research* 32, 847-860
- 830 64. ThermoFisherScientific (2016) Boldly go above and beyond. USA
- 831 65. Liu, F., Vermesh, O., Mani, V., Ge, T. J., Madsen, S. J., Sabour, A., Hsu, E.-C.,  
832 Gowrishankar, G., Kanada, M., Jokerst, J. V., Sierra, R. G., Chang, E., Lau, K., Sridhar, K.,  
833 Bermudez, A., Pitteri, S. J., Stoyanova, T., Sinclair, R., Nair, V. S., Gambhir, S. S., and Demirci, U.  
834 (2017) The Exosome Total Isolation Chip. *ACS Nano* 11, 10712-10723
- 835 66. Ciravolo, V., Huber, V., Ghedini, G. C., Venturelli, E., Bianchi, F., Campiglio, M., Morelli,  
836 D., Villa, A., Mina, P. D., and Menard, S. (2012) Potential role of HER2-overexpressing exosomes  
837 in countering trastuzumab-based therapy. *Journal of Cellular Physiology* 227, 658-667
- 838 67. Higginbotham, J. N., Beckler, M. D., Gephart, J. D., Franklin, J. L., Bogatcheva, G.,  
839 Kremers, G.-J., Piston, D. W., Ayers, G. D., McConnell, R. E., and Tyska, M. J. (2011) Amphiregulin  
840 exosomes increase cancer cell invasion. *Current Biology* 21, 779-786
- 841 68. Clark, D. J., Fondrie, W. E., Liao, Z., Hanson, P. I., Fulton, A., Mao, L., and Yang, A. J. (2015)  
842 Redefining the breast cancer exosome proteome by tandem mass tag quantitative proteomics  
843 and multivariate cluster analysis. *Analytical Chemistry* 87, 10462-10469
- 844 69. Sandvig, K., and Llorente, A. (2012) Proteomic analysis of microvesicles released by the  
845 human prostate cancer cell line PC-3. *Molecular & Cellular Proteomics* 11, M111. 012914
- 846 70. Mathivanan, S., Lim, J. W., Tauro, B. J., Ji, H., Moritz, R. L., and Simpson, R. J. (2010)  
847 Proteomics analysis of A33 immunoaffinity-purified exosomes released from the human colon  
848 tumor cell line LIM1215 reveals a tissue-specific protein signature. *Molecular & Cellular*  
849 *Proteomics* 9, 197-208
- 850 71. Redzic, J. S., Ung, T. H., and Graner, M. W. (2014) Glioblastoma extracellular vesicles:  
851 reservoirs of potential biomarkers. *Pharmacogenomics and personalized medicine* 7, 65-77
- 852 72. Thuringer, D., Hammann, A., Benikhlef, N., Fourmaux, E., Bouchot, A., Wettstein, G.,  
853 Solary, E., and Garrido, C. (2011) Transactivation of the epidermal growth factor receptor by  
854 heat shock protein 90 via Toll-like receptor 4 contributes to the migration of glioblastoma cells.  
855 *The Journal of biological chemistry* 286, 3418-3428
- 856 73. Graner, M. W., Cumming, R. I., and Bigner, D. D. (2007) The Heat Shock Response and  
857 Chaperones/Heat Shock Proteins in Brain Tumors: Surface Expression, Release, and Possible  
858 Immune Consequences. *The Journal of Neuroscience* 27, 11214-11227
- 859 74. Wade, A., Robinson, A. E., Engler, J. R., Petritsch, C., James, C. D., and Phillips, J. J. (2013)  
860 Proteoglycans and their roles in brain cancer. *The FEBS journal* 280, 2399-2417
- 861 75. Mooney, K. L., Choy, W., Sidhu, S., Pelargos, P., Bui, T. T., Voth, B., Barnette, N., and  
862 Yang, I. (2016) The role of CD44 in glioblastoma multiforme. *Journal of Clinical Neuroscience* 34,  
863 1-5
- 864 76. Kraan, J., van den Broek, P., Verhoef, C., Grunhagen, D. J., Taal, W., Gratama, J. W., and  
865 Sleijfer, S. (2014) Endothelial CD276 (B7-H3) expression is increased in human malignancies and  
866 distinguishes between normal and tumour-derived circulating endothelial cells. *British journal of*  
867 *cancer* 111, 149-156
- 868 77. Tryndyak, V. P., Kovalchuk, O., and Pogribny, I. P. (2006) Loss of DNA methylation and  
869 histone H4 lysine 20 trimethylation in human breast cancer cells is associated with aberrant

870 expression of DNA methyltransferase 1, Suv4-20h2 histone methyltransferase and methyl-  
871 binding proteins. *Cancer Biology & Therapy* 5, 65-70  
872 78. Beliakoff, J., and Whitesell, L. (2004) Hsp90: an emerging target for breast cancer  
873 therapy. *Anti-Cancer Drugs* 15, 651-662  
874 79. Price, J. T., Tiganis, T., Agarwal, A., Djakiew, D., and Thompson, E. W. (1999) Epidermal  
875 growth factor promotes MDA-MB-231 breast cancer cell migration through a  
876 phosphatidylinositol 3 $\alpha$ -kinase and phospholipase C-dependent mechanism. *Cancer Research*  
877 59, 5475-5478  
878 80. de Vrij, J., Maas, S. L. N., Kwappenberg, K. M. C., Schnoor, R., Kleijn, A., Dekker, L., Luider,  
879 T. M., de Witte, L. D., Litjens, M., van Strien, M. E., Hol, E. M., Kroonen, J., Robe, P. A., Lamfers,  
880 M. L., Schilham, M. W., and Broekman, M. L. D. (2015) Glioblastoma-derived extracellular  
881 vesicles modify the phenotype of monocytic cells. *International Journal of Cancer* 137, 1630-  
882 1642  
883 81. Helwa, I., Cai, J. W., Drewry, M. D., Zimmerman, A., Dinkins, M. B., Khaled, M. L.,  
884 Seremwe, M., Dismuke, W. M., Bieberich, E., Stamer, W. D., Hamrick, M. W., and Liu, Y. T. (2017)  
885 A Comparative Study of Serum Exosome Isolation Using Differential Ultracentrifugation and  
886 Three Commercial Reagents. *Plos One* 12, 22  
887 82. Lötval, J., Hill, A. F., Hochberg, F., Buzás, E. I., Di Vizio, D., Gardiner, C., Gho, Y. S.,  
888 Kurochkin, I. V., Mathivanan, S., Quesenberry, P., Sahoo, S., Tahara, H., Wauben, M. H., Witwer,  
889 K. W., and Théry, C. (2014) Minimal experimental requirements for definition of extracellular  
890 vesicles and their functions: a position statement from the International Society for Extracellular  
891 Vesicles. *J. Extracell. Vesicles* 3, 26913  
892

893

894

895

## 896 **Figure Legends**

897 **Figure 1: Measured relative protein amount pr. million cells in exosome samples from**  
898 **GBM- and BC cells isolated by kit and UC (n  $\geq$  2). [page 18]**

899 **A)** The measured relative protein amount (%) for the BC exosome isolates. **B)** The measured  
900 relative protein amount (%) for the GBM exosome isolates. Each replicate is depicted as circles,  
901 and the median depicted as a line. The X-mark shows the measured relative protein amount in the

902 blank sample (isolated cell culture medium). The protein amounts were measured by UV-Vis  
903 spectrophotometry (absorption at  $\lambda = 562$  nm) after reaction with BCA kit reagents.

904  
905 **Figure 2: Transmission electron micrographs and hydrodynamic particle size (nm)**  
906 **distribution by DLS analysis of exosomes isolated by kit and UC from GBM- and BC cells.**

907 *[page 18]*

908 The TEM-samples were immunogold labelled with anti-CD9, with gold particles depicted as 10  
909 nm black dots. Images were taken with a magnification of 400 000, and the dashed areas were  
910 additionally zoomed. **A)** Micrographs of CD9-labelled GBM exosome isolates. **I** depict the  
911 micrograph from a kit isolate, **II** the kit blank, **III** a UC isolate, and **IV** the UC blank. **B)** DLS  
912 analysis of GBM exosomes isolated by kit and UC ( $n = 1$ ). No particles were detected in the UC  
913 blank ( $n = 1$ ). DLS analysis of the kit blank was not performed. **C)** Micrographs of CD9-labelled  
914 BC exosome isolates. **I** depict the micrograph from a kit isolate, **II** the kit blank, **III** a UC isolate,  
915 and **IV** the UC blank. **D)** DLS analysis of BC exosomes isolated by kit ( $n = 2$ ) and UC ( $n = 3$ ),  
916 including the kit blank ( $n = 1$ ). No particles were detected in the UC blank.

917  
918

919 **Figure 3: Western blot of common protein exosome markers.** *[page 20]*

920 The protein markers CD81, CD9, CD63, TSG101, flotillin-1 (positive markers, +) and calnexin  
921 (negative marker, -) were targeted in cell lysates and exosomes isolated by kit and UC ( $n \geq 2$ ).  
922 Monoclonal mouse antibodies were used for CD81, CD9, CD63, flotillin-1 and calnexin, while a  
923 polyclonal rabbit antibody was used for TSG101. For the BC exosomes, 15  $\mu$ g protein was  
924 loaded for kit isolates and 3  $\mu$ g for UC isolates. For the GBM exosomes, ~14  $\mu$ g was loaded for

925 kit isolates and ~8 µg for UC isolates. Uncropped western blots are presented in **Supplemental**  
926 **Western Blots.**

927  
928 **Figure 4: Chromatograms and MS/MS spectrums from LC-MS/MS analysis of GBM- and**  
929 **BC exosome peptides. [page 22]**

930 **A)** Chromatogram with corresponding MS/MS spectrum for the CD9 signature peptide  
931 KDVLETFTVK ( $m/z=393.89$ ,  $z=3$ ) in BC exosomes isolated by UC. **C)** Chromatogram with  
932 corresponding MS/MS spectrum for the calnexin signature peptide AEEDEILNR ( $m/z=544.77$ ,  
933  $z=2$ ) from GBM exosomes isolated by UC. An in-house packed 50 µm x 150 mm column with 80  
934 Å Accucore particles with C<sub>18</sub> stationary phase was used for separation. A 50 µm x ~3 mm in-  
935 house packed pre-column with the same column material was used for trapping. The elution was  
936 performed with a linear gradient of 3-15 % MP B in 120 minutes. See **Section 2.11.1** for more  
937 LC-MS/MS parameters.

938  
939  
940  
941  
942  
943 **Figure 5: GO annotation of proteins in BC exosomes to different cellular locations. [page**  
944 **23]**

945 The identified proteins classified by their cellular location (GO annotations) grouped based on  
946 their positive/ negative relevance towards exosomes. The annotated proteins (% of total proteins)  
947 and their cellular location, with proteins annotated from the kit isolates are shown in red (from

948 749 DAVID ID's), while proteins annotated from the UC isolates are shown in blue (from 615  
949 DAVID ID's).

950  
951 **Figure 6: Venn diagram presenting the number of proteins identified by LC-MS/MS in**  
952 **exosomes isolated by kit and UC from GBM- and BC cell culture medium. [page 24]**

953 The numbers are the total number of unique proteins identified when trypsin, keratin related  
954 proteins and the proteins identified in blank isolates were disregarded. One signature peptide was  
955 selected as requirement for positive identifications during database search. Equal amounts of  
956 protein were injected for both kit- and UC isolates (~ 1.5 µg protein for GBM isolates (n = 6) and  
957 ~2-5 µg protein for BC exosomes (n=3)). A list of all proteins identified is presented in

958 **Supplemental Proteins.**

959

960

961

962

963

964

965

966

967 **Tables**

968 **Table 1: A selection of common protein markers (from LC-MS/MS analyses) with a specific**  
969 **exosome related function.** The exosome markers were identified in BC- and GBM exosome  
970 samples isolated by kit and UC. In addition, proteins identified in blank isolates are shown.

| Protein marker                            | Exosome related function | GBM |          |     |           | BC |          |     |           |
|-------------------------------------------|--------------------------|-----|----------|-----|-----------|----|----------|-----|-----------|
|                                           |                          | UC  | UC blank | Kit | Kit blank | UC | UC blank | Kit | Kit blank |
| CD81                                      | Membrane protein         | x   | -        | -   | -         | x  | -        | -   | -         |
| CD9                                       | Membrane protein         | x   | -        | x   | -         | x  | x        | x   | -         |
| CD63                                      | Membrane protein         | x   | -        | x   | -         | x  | -        | -   | -         |
| TSG101                                    | Exosome biogenesis       | -   | -        | -   | -         | x  | -        | -   | -         |
| Annexin A2                                | Exosome biogenesis       | x   | -        | x   | -         | x  | -        | x   | -         |
| Flotillin-1                               | Exosome biogenesis       | -   | -        | -   | -         | x  | -        | -   | -         |
| Calnexin                                  | Negative                 | x   | -        | x   | -         | -  | -        | -   | -         |
| Serine/<br>threonine-protein<br>kinase 26 | Negative                 | -   | -        | -   | -         | -  | -        | -   | -         |
| Actin                                     | General marker           | x   | x        | x   | x         | x  | -        | x   | x         |

971

972

973

974

975

976 **Table 2: Comparison of characteristics of exosome isolated from GBM and BC cell culture**

977 **medium.** In the table, UC and kit were compared for their ability to isolate pure exosomes. The

978 comparison is based on the characterization techniques used in the present study. Increasing

979 number of + signs indicate positive relation regarding indications of exosomes and/or high purity  
980 of exosomes.

| Characterization method                | GBM |     | BC  |     |
|----------------------------------------|-----|-----|-----|-----|
|                                        | UC  | Kit | UC  | Kit |
| Protein amount (corrected for blank)   | +   | ++  | +   | ++  |
| TEM                                    | ++  | +   | +++ | ++  |
| DLS                                    | +++ | +++ | +   | ++  |
| WB (positive markers)                  | ++  | +   | +   | ++  |
| WB (negative markers)                  | +   | +   | +++ | +++ |
| LC-MS/MS (positive markers)            | ++  | +   | +++ | +   |
| LC-MS/MS (negative markers)            | +   | ++  | +++ | +++ |
| LC-MS/MS number of identified proteins | +++ | +   | +   | ++  |
| LC-MS/MS biomarkers                    | ++  | +   | ++  | ++  |

981

982

983

984

985

986

987

988

989

990

991

992

993

994 **Figures**

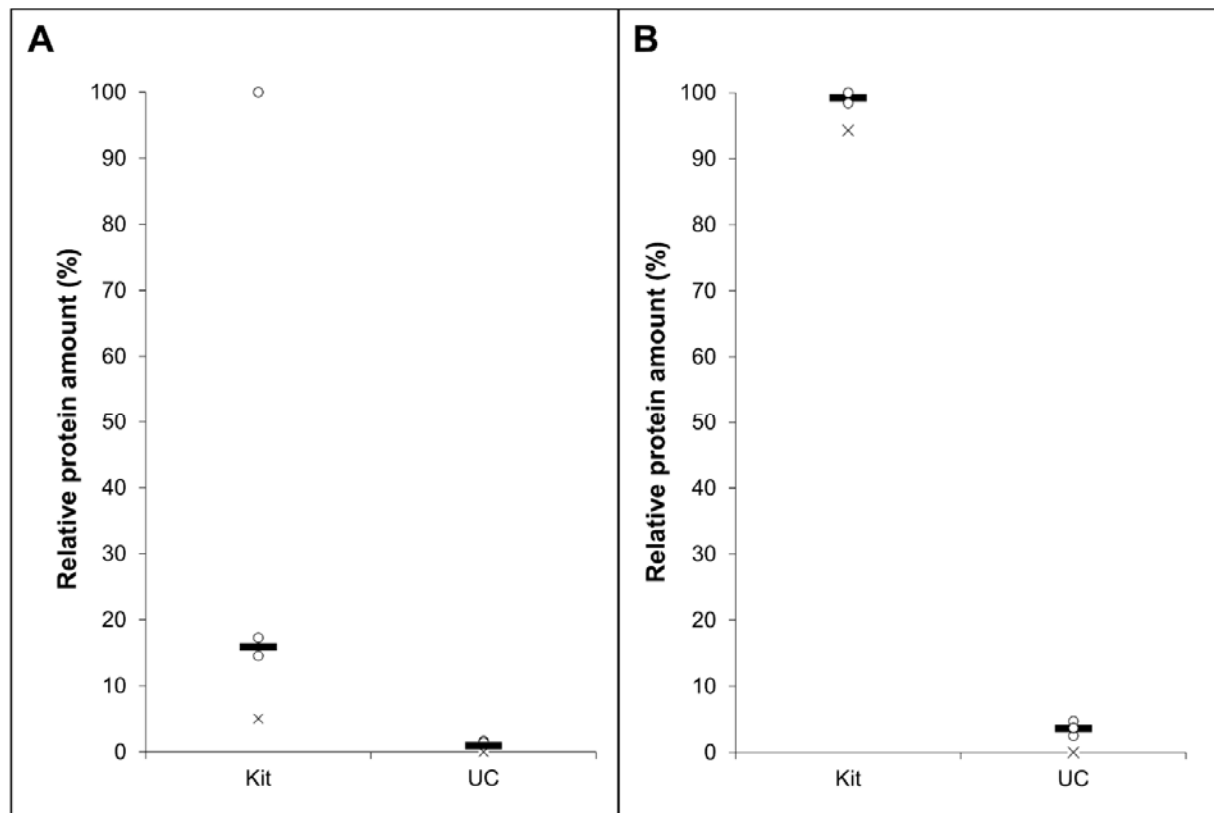

995

996 **Figure 1**



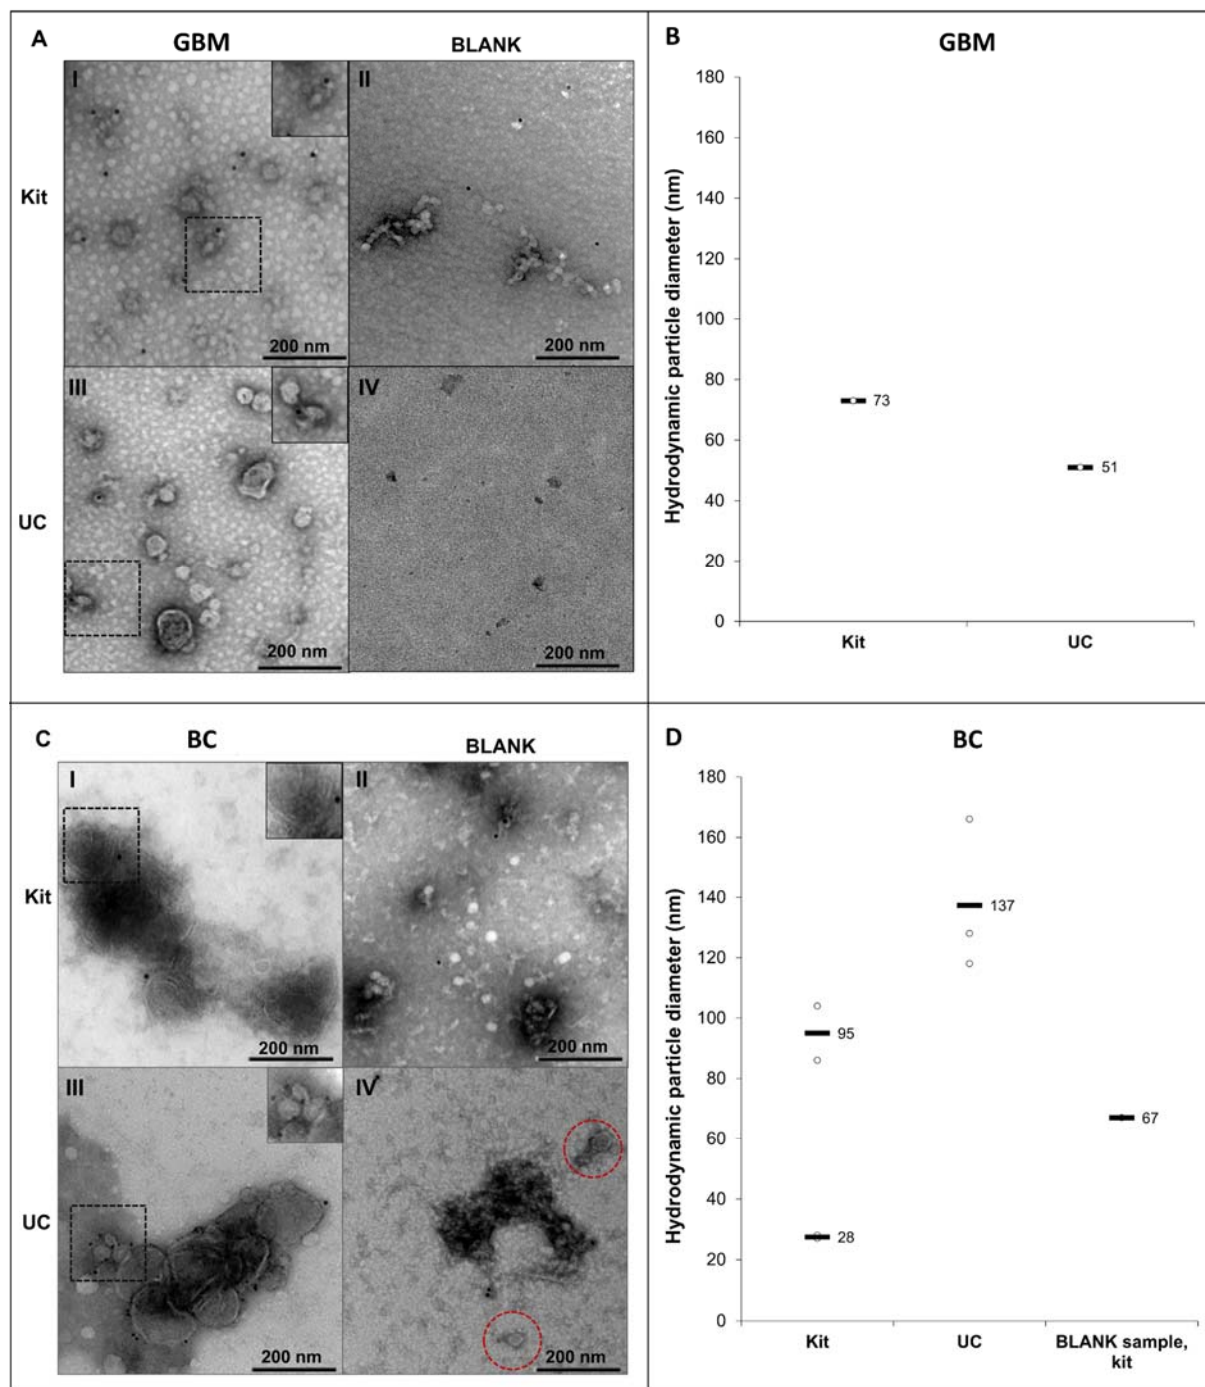

997

998 **Figure 2**

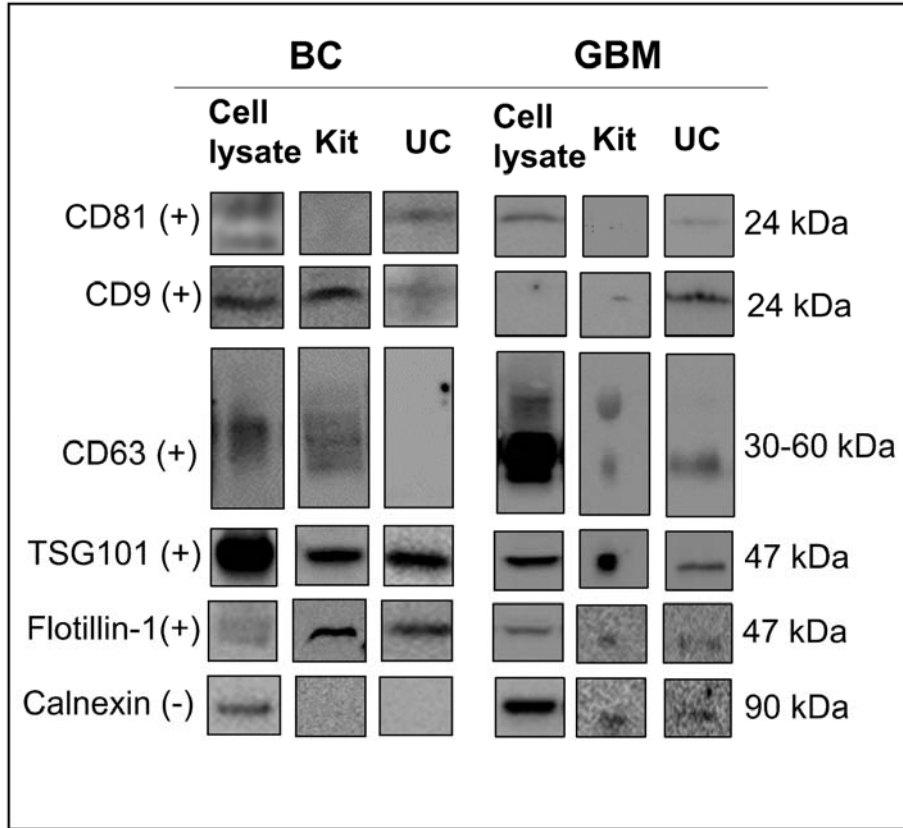

999

1000 **Figure 3**

1001

1002

1003

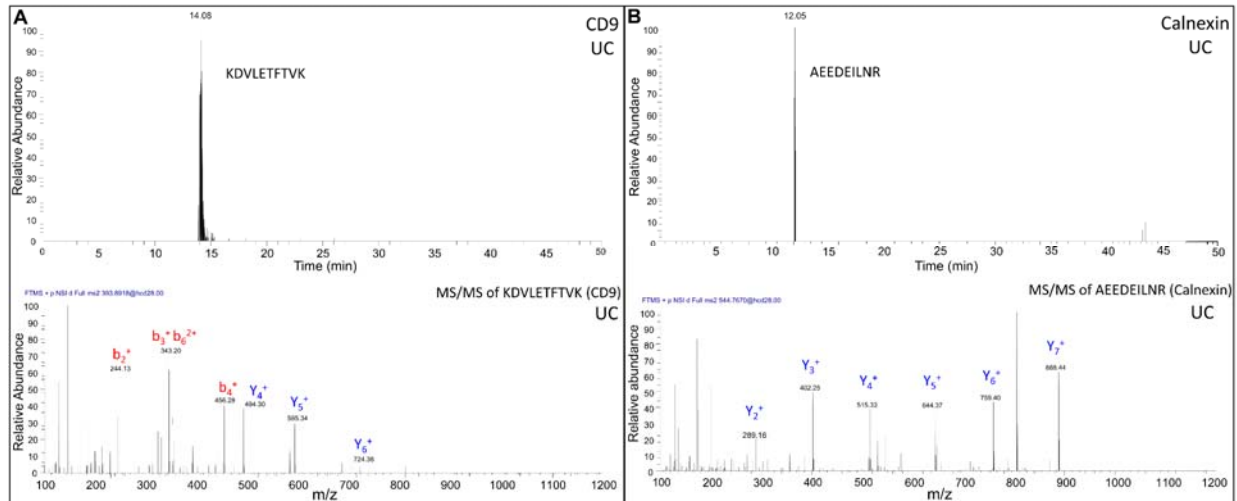

1004

1005 **Figure 4**

1006

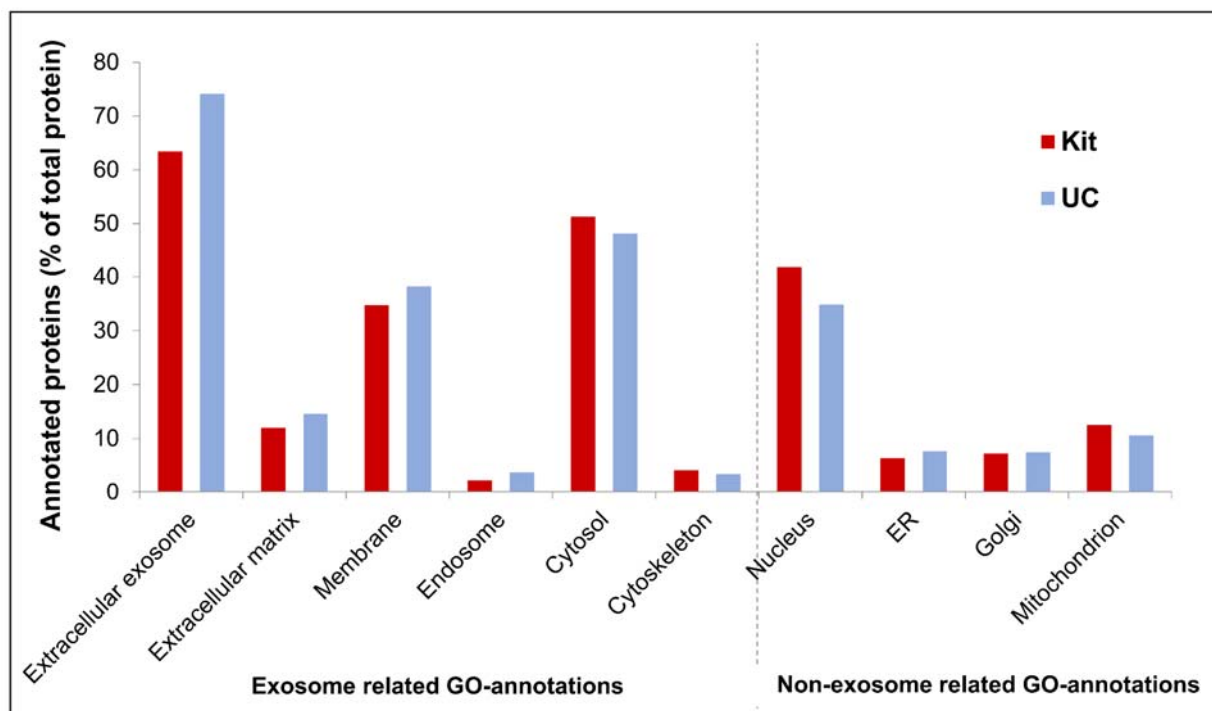

1007

1008 **Figure 5**

1009

1010

1011

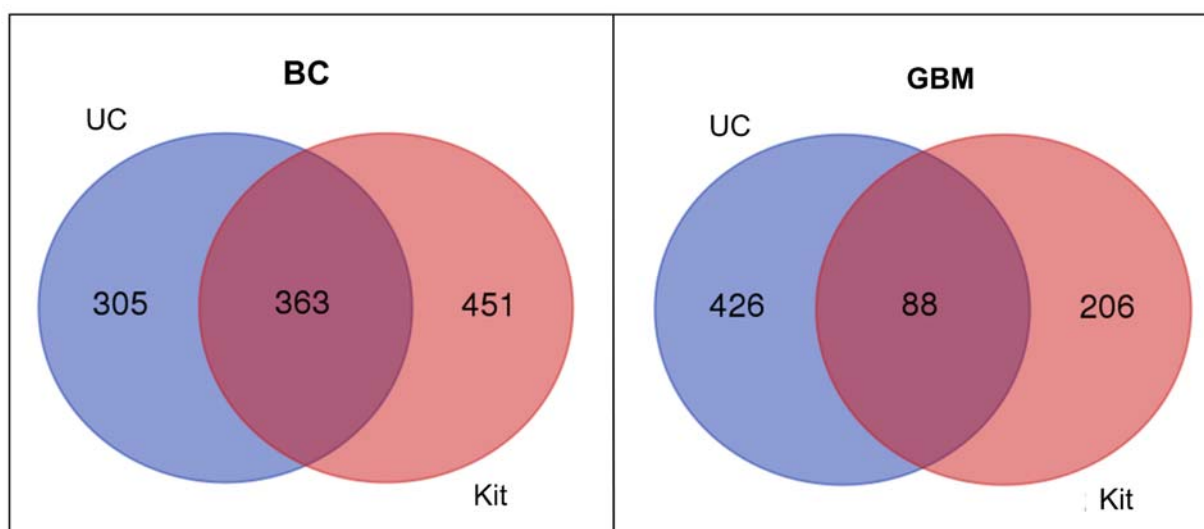

1012

1013 **Figure 6**
